# Supplementary material for: Patients as partners in Enhanced Recovery After Surgery: A qualitative patient-led study
Source: PubMed Central journal article supplement — BMJ Open. 2017 Jun 24;7(6):e017002. doi: 10.1136/bmjopen-2017-017002 (PMC5726093; doi:10.1136/bmjopen-2017-017002), 2017-06-24
Supplement: bmjopen-2017-017002.draft_revisions.pdf [file bmjopen-2017-017002.draft_revisions.pdf]

# BMJ Open

## Patients as partners in Enhanced Recovery After Surgery

|                                    |                                                                                                                                                                                                                                                                                                                                                                                                                                                                                                                                                                                                                                                                                                                                                                                                                                                                    |
|------------------------------------|--------------------------------------------------------------------------------------------------------------------------------------------------------------------------------------------------------------------------------------------------------------------------------------------------------------------------------------------------------------------------------------------------------------------------------------------------------------------------------------------------------------------------------------------------------------------------------------------------------------------------------------------------------------------------------------------------------------------------------------------------------------------------------------------------------------------------------------------------------------------|
| Journal:                           | <i>BMJ Open</i>                                                                                                                                                                                                                                                                                                                                                                                                                                                                                                                                                                                                                                                                                                                                                                                                                                                    |
| Manuscript ID                      | bmjopen-2017-017002                                                                                                                                                                                                                                                                                                                                                                                                                                                                                                                                                                                                                                                                                                                                                                                                                                                |
| Article Type:                      | Research                                                                                                                                                                                                                                                                                                                                                                                                                                                                                                                                                                                                                                                                                                                                                                                                                                                           |
| Date Submitted by the Author:      | 27-Mar-2017                                                                                                                                                                                                                                                                                                                                                                                                                                                                                                                                                                                                                                                                                                                                                                                                                                                        |
| Complete List of Authors:          | Gillis, Chelsia; University of Calgary , Community Health Sciences<br>Gill, Marlyn; University of Calgary, PaCER Innovates<br>Marlett, Nancy; University of Calgary, Community Health Sciences ;<br>University of Calgary , PaCER Innovates<br>Mackean, Gail; University of Calgary, Cumming School of Medicine<br>GermAnn, Kathy; University of Alberta, School of Public Health<br>Gilmour , Loreen; Alberta Health Services, ERAS Alberta<br>Nelson, Gregg; University of Calgary, Oncology and Obstetrics ; University<br>of Calgary, Gynecology<br>Wasylak, Tracy; Alberta Health Services, Strategic Clinical Networks™<br>Nguyen, Susan ; University of Calgary, PaCER Innovates<br>Araujo, Edamil ; University of Calgary, PaCER Innovates<br>Zelinsky, Sandra; University of Calgary, PaCER Innovates<br>Gramlich , Leah; University of Alberta, Medicine |
| <b>Primary Subject<br>Heading</b>: | Patient-centred medicine                                                                                                                                                                                                                                                                                                                                                                                                                                                                                                                                                                                                                                                                                                                                                                                                                                           |
| Secondary Subject Heading:         | Surgery, Qualitative research                                                                                                                                                                                                                                                                                                                                                                                                                                                                                                                                                                                                                                                                                                                                                                                                                                      |
| Keywords:                          | Colorectal surgery < SURGERY, QUALITATIVE RESEARCH, Quality in health<br>care < HEALTH SERVICES ADMINISTRATION & MANAGEMENT                                                                                                                                                                                                                                                                                                                                                                                                                                                                                                                                                                                                                                                                                                                                        |
|                                    |                                                                                                                                                                                                                                                                                                                                                                                                                                                                                                                                                                                                                                                                                                                                                                                                                                                                    |

SCHOLARONE™  
Manuscripts

BMJ

1  
2  
3 **Title:** Patients as partners in Enhanced Recovery After Surgery  
4

5  
6 Gillis C, Gill M, Marlett N, MacKean G, GermAnn K, Gilmour L, Nelson G, Wasylak T, Nguyen S, Araujo  
7  
8 E, Zelinsky S, Gramlich L  
9

10 Chelsia Gillis RD MSc, Cumming School of Medicine, Department of Community Health Sciences,  
11  
12 University of Calgary, Calgary, Alberta, Canada  
13

14  
15 Marlyn Gill MSW, PaCER Innovates, University of Calgary, Calgary, Alberta, Canada  
16

17  
18 Nancy Marlett PhD, Cumming School of Medicine, Department of Community Health Sciences, University  
19  
20 of Calgary, Calgary, Alberta, Canada; PaCER Innovates, University of Calgary, Calgary, Alberta, Canada  
21

22  
23 Gail MacKean MPA, PhD, Cumming School of Medicine, University of Calgary, Calgary, Alberta, Canada  
24

25  
26 Kathy GermAnn, PhD, BScN, School of Public Health, University of Alberta, Edmonton, Alberta, Canada;  
27  
28 Independent Health & Human Services Research & Evaluation Consultant  
29

30  
31 Loreen Gilmour PhD, ERAS Alberta, Alberta Health Services, Alberta, Canada  
32

33  
34 Gregg Nelson MD PhD FRCSC, Departments of Oncology and Obstetrics & Gynecology, Cumming  
35  
36 School of Medicine, University of Calgary, Calgary, Alberta, Canada  
37

38  
39 Tracy Wasylak BN, MSc, CHE, Strategic Clinical Networks™, Alberta Health Services, Alberta, Canada  
40

41  
42 Susan Nguyen, PaCER Innovates, University of Calgary, Calgary, Alberta, Canada  
43

44  
45 Edamil Araujo MSc, PaCER Innovates, University of Calgary, Calgary, Alberta, Canada  
46

47  
48 Sandra Zelinsky, PaCER Innovates, University of Calgary, Calgary, Alberta, Canada  
49

50  
51 Leah Gramlich MD, Department of Medicine, University of Alberta, Edmonton, Alberta, Canada  
52

53 **Corresponding Author:**

54  
55 Chelsia Gillis RD MSc

56  
57 University of Calgary  
58  
59  
60

1  
2  
3 TRW Building

4  
5 3rd Floor

6  
7 3280 Hospital Drive NW

8  
9  
10 Calgary, Alberta CANADA T2N 4Z6

11  
12  
13 chelsia.gillis@ucalgary.ca

14  
15  
16 **Structured Abstract**

17  
18 **Objectives:** Explore the experience of patients undergoing colorectal surgery within an Enhanced  
19 Recovery After Surgery(ERAS) program. Use this experiential data to inform the development of a  
20 framework to support ongoing, meaningful patient engagement in ERAS.  
21  
22

23  
24  
25 **Design:** Qualitative patient-led study using focus groups and narrative interviews. Data were analyzed  
26 iteratively using a Participatory Grounded Theory approach.  
27  
28

29  
30 **Setting:** Five tertiary care centers in Alberta, Canada following the ERAS program.  
31

32  
33 **Participants:** Twenty-seven patients who had undergone colorectal surgery in the last 12 months were  
34 recruited through purposive sampling. Seven patients participated in a co-design focus group to set and  
35 prioritize the research direction. Narrative interviews were conducted with 20 patients.  
36  
37

38  
39 **Results:** Patients perceived that an ERAS program should not be limited to the perioperative period, but  
40 should encompass the journey from diagnosis to recovery. Practical recommendations to improve the  
41 patient experience across the surgical continuum, and enhance patient engagement within ERAS  
42 included:(1) Fully explain every protocol, and the purpose of the protocol, both before surgery and while  
43 in-hospital, so that patients can become knowledgeable partners in their recovery;(2) Extend ERAS  
44 guidelines to the pre-surgery phase, so that patients can be ready emotionally, psychologically and  
45 physically for surgery;(3) Extend ERAS guidelines to the recovery period at home to avoid stressful  
46 situations for patients and families;(4) Consider activating a program where experienced patients can  
47 provide peer support;(5) One-size does not fit all; personalized adaptations within the standardized  
48 pathway are required.  
49  
50  
51  
52  
53  
54  
55  
56  
57  
58  
59  
60

1  
2  
3 Drawing upon this data, and through consultation with ERAS Alberta stakeholders, the ERAS team  
4 developed a matrix to guide sustained patient involvement and action throughout the surgical care  
5 continuum at three levels: individual, unit, and ERAS system.  
6  
7

8  
9  
10 **Conclusion:** This patient-led study generated new insights into the needs of ERAS patients and informed  
11 the development of a framework to improve patient experiences and outcomes.  
12

#### 13 **Article Summary: Strengths and limitations of this study**

- 14
- 15
- 16
- 17 • This is the first patient-led ERAS study, whereby patients were trained to conduct experiential  
18 patient research, to characterize the needs and expectations of patients following ERAS care.  
19
- 20 • Our qualitative findings emerged from participatory grounded theories: a methodology that  
21 involves patients as partners throughout the research process.  
22
- 23 • Patient-led research provides an important link between experiential patient research and  
24 implementation, adding to the foundation of implementation science.  
25
- 26 • We cannot assume that our findings regarding patients' experience with ERAS for colorectal  
27 surgery are representative of all patient experiences with ERAS.  
28  
29  
30  
31  
32  
33

34 **Authorship statement:** All authors meet the ICMJE criteria for authorship. NM, MG, SZ, LG, GN, TW,  
35 LG were involved in the conception and design of the PaCER work. GM and KM conceived, designed,  
36 and wrote the implementation component. MG, NM, SZ, SN, EA were involved with the acquisition,  
37 analysis, and interpretation of data. CG was involved with interpretation of the data and drafted the  
38 manuscript. All authors significantly contributed to the revision of the manuscript and provided final  
39 approval of the manuscript. All authors have agreed to be accountable for all aspects of the work.  
40  
41  
42  
43  
44  
45  
46

47 **Funding statement:** This work was supported by Canadian Institutes of Health Research - Strategy for  
48 Patient-Oriented Research (SPOR) - Patient Engagement - Collaboration Grants (grant number: 258077)  
49  
50

51 **Competing interests statement:** The authors have no competing interest to disclose.  
52  
53

54 **Data sharing statement:** The authors do not have unpublished data to share.  
55  
56  
57  
58  
59  
60

## Introduction

The Enhanced Recovery After Surgery (ERAS) program applies evidence-based perioperative interventions that, collectively, reduce morbidity and length of hospital stay.<sup>1-3</sup> Given its clinical success, a number of qualitative studies have been conducted to provide insight into patient experiences and satisfaction with the program. Overall, a high level of contentment with ERAS has been reported with the exception of a few services: preoperative preparation and postoperative support have been consistently documented as not meeting patient needs.<sup>4-7</sup> Despite these qualitative findings, there has been little change in the pre- and postoperative supportive guidelines.

Patient-centeredness is fundamental to the mission of healthcare, yet traditionally patients have not been involved as partners in shaping their health services. This issue is multifaceted and has real clinical consequences. For instance, central to ERAS' effectiveness, is the adherence to 22 elements,<sup>8</sup> some of which, such as pre-admission oral carbohydrate loading, are completely reliant on patient adherence. A clearer understanding of the patient's perceived and potential role, as well as how to best support patients throughout their surgical journey is an essential first step in mitigating potential patient barriers to successful ERAS implementation. Furthermore, understanding this experience from the patient perspective can highlight issues that health professionals & health systems may not anticipate.

The primary research objective was to explore the experience of patients undergoing colorectal surgery within an ERAS program, in order to develop a better understanding of how the ERAS system currently supports patient needs. Although a number of qualitative studies have addressed patients' experience with ERAS, no studies have been driven by patients, working with patients. Trained patient researchers with relevant surgery experience can effectively engage patient-participants throughout the research process to ensure the findings are relevant and important to the users of ERAS.<sup>9</sup>

In an effort to move beyond the dissemination of our findings, the ERAS team employed patient engagement consultants to develop a patient engagement framework for ERAS; therefore, the research conducted also includes an implementation component, which will be presented as part of the study

1  
2  
3 findings. Building capacity for sustained patient engagement within the existing ERAS system has the  
4 potential to impact medical decision-making, care process across the continuum, the quality of research  
5 conducted, uptake of research findings, adherence to care guidelines, and, ultimately, health  
6  
7 outcomes.<sup>10,11</sup>  
8  
9

## 10 11 **Methods**

12  
13 Patient and Community Engagement Researchers (PaCERs) are patients who have been trained to  
14 conduct experiential qualitative research using Participatory Grounded Theory methodology for the  
15 purpose of transforming the role of the patient's health, healthcare, and health research.<sup>9,12</sup> The PaCER  
16 methodology of *Set, Collect, Reflect* (Figure 1) engages patient-participants as partners throughout every  
17 step of the research process for the purpose of developing testable theories based on real world patient  
18 experience. Employing patient-researchers, who have undergone a similar experience to that of the  
19 patient-participants, facilitates an environment whereby participants can be comfortable uncovering the  
20 depths of their own experience, and may reduce the perceived power imbalance between researcher and  
21 interviewee.<sup>13,14</sup>  
22  
23  
24  
25  
26  
27  
28  
29  
30  
31

### 32 *Patients*

33  
34  
35 A total of 27 patients were enrolled between July 2015 and Sept 2016 through purposive sampling from  
36 five hospitals in Alberta, Canada employing the ERAS Alberta Implementation Program for colorectal  
37 surgery.<sup>2</sup> Ethics approval for the PaCER study was obtained by the Conjoint Research Ethics Board.  
38 Patients met inclusion criteria if they had been identified by their surgeons as participants in the ERAS  
39 program, were >18 years of age, and spoke English well enough to participate in a focus group or  
40 interview. Patients did not have a prior relationship with the PaCER research team, and were made  
41 aware of the study objective. Recruitment was conducted by telephone and separated into two phases to  
42 generate a sample representative of varied postoperative lengths and experiences. Phase one (n=15)  
43 involved recruitment for one focus group (n=7) and 8 narrative interviews with patients who had  
44 undergone surgery in the previous 12 months. Phase two consisted of 12 in-hospital interviews and 7  
45 follow-up interviews at three-weeks post-surgery. The sample included 10 females and 17 males, aged  
46  
47  
48  
49  
50  
51  
52  
53  
54  
55  
56  
57  
58  
59  
60 29 to 89 years. None of the patients withdrew from the study.

### *Set/Co-Design Focus Group*

The *Set* stage is the initial co-design phase of the PaCER methodology.<sup>9</sup> A 5-hour focus group was held in a private space within the university, with 7 patients representing 4 hospitals, for the purpose of guiding data collection (i.e., language and scope of responses). The initial question posed to the group was: *Please tell us about your post- surgery experience while you were in hospital.* This question opened the door for participants to describe their knowledge of ERAS and recount their experiences coping with the ERAS protocols. Discussion among the participants was encouraged with a series of prompts used by trained PaCER researchers to deepen and elaborate the information provided. The focus group was facilitated audio recorded and transcribed by the PaCER researchers.

The topics that emerged included: 1) *How nurses introduced and encouraged the ERAS protocols during the preoperative clinic education appointment and in-hospital;* 2) *Pre-surgery stress;* 3) *Surprise at the high level of gas pain;* 4) *Stress around biopsy results;* 5) *Nutrition;* 6) *Level of knowledge of ERAS;* 7) *Journals* (an ERAS Alberta initiative to get patients to track compliance to ERAS elements not traditionally included in the ERAS program or within patient charts). These initial ideas were shared with the ERAS teams and researchers and were used to formulate subsequent guiding questions for the data collection phase.

### *Data collection / Analysis cycles*

Data collection and analysis was conducted according to grounded theory practice, with small groups of interviews analyzed by three PaCER researchers using open coding methods, in an iterative process to ensure interrogation of the data and emerging themes, as well as to guide the direction of recruitment and data collection strategies.<sup>9</sup>

Narrative interviews encouraged participants to “tell their story”, using prompts sparingly to elicit greater depth. Phase one included 8 individual narrative interviews, in which 5 hospitals were represented. Phase two included participants from one hospital, in which 12 individual narrative interviews were conducted on

1  
2  
3 the second postoperative day with 7 follow-up interviews 3-weeks post-discharge. The interviews  
4  
5 conducted at bedside were uninterrupted by non-participants. Data code saturation was reached after the  
6  
7 tenth narrative interview. All interviews were conducted, audio recorded and transcribed by the PaCER  
8  
9 researchers. After each interview and focus group the participants reflected on what they had learned  
10  
11 about their experience and what they thought should be explored in future interviews. Data collection /  
12  
13 analysis cycles with the PaCER team continued until a core construct emerged that organized the  
14  
15 working theory and emerging themes.<sup>9</sup>  
16

### 17 *Reflect*

18  
19  
20 Participants from the interview and co-design phases were invited to *Reflect* on the study findings.<sup>9</sup>  
21  
22 Interested participants (n=7) engaged in a telephone interview to discuss the findings and offer feedback.  
23  
24 This stage tests the truth value and consistency of the findings with the users of the ERAS program.  
25

26  
27 The net result is a research method that involved patients as partners throughout the research process.  
28  
29 The Inclusion of patients in analysis and interpretation of findings ensures pragmatic and relevant  
30  
31 recommendations. In fact, Participatory Grounded Theory has been used successfully to develop  
32  
33 practice-changing theories to treat osteoarthritis and improve care in the intensive care unit.<sup>12,15</sup>  
34

### 35 *Reliability*

36  
37  
38 Grounded theory methods ensure careful and ongoing interrogation of findings as data is collected and  
39  
40 analyzed. In addition, methods (two distinct methods, three phases of research) and data sources (five  
41  
42 hospitals and in-patient, follow-up interviews) provided a foundation for triangulation of data to enhance  
43  
44 the rigor of the study and breadth of study findings.<sup>16</sup> Research colleagues in ERAS, academic PaCER  
45  
46 supervisors and peers were also asked to review and discuss the emerging data, coding, and themes to  
47  
48 confirm the findings for the purpose of achieving investigator triangulation.  
49

### 50 **Results**

51  
52 The core concept that emerged from the data was clear: the majority of patients, once they understood  
53  
54 the ERAS program, wanted to be included to know why the protocols were important and, most of all,  
55  
56 wanted to take on an active, collaborative role throughout their surgical journey. By beginning this  
57  
58  
59  
60



1  
2  
3 partnership early, patients feel better prepared to leave hospital and continue their recovery at home.  
4  
5 Thus, the overarching concept is “invite me into ERAS, from diagnosis to recovery, so that I can take  
6  
7 responsibility for my own health”. Patients perceived that, to be a program focused on enhanced  
8  
9 recovery, ERAS should not be limited to the perioperative period, but should encompass the journey from  
10  
11 diagnosis to recovery at home (Figure 2). The results section is therefore divided into four main  
12  
13 categories, each with subcategories: (1) Patient preoperative experiences with seven subcategories; (2)  
14  
15 In-hospital experiences with providers with five subcategories; (3) Non-provider related in-hospital  
16  
17 experiences with 2 subcategories; (4) Post hospital discharge experiences with four subcategories (Table  
18  
19 1).

## 20 21 22 23 **1. Waiting & preparing for surgery: Preoperative experiences**

### 24 25 ***Knowledge of ERAS***

26  
27 More than half of patients interviewed didn't know what ERAS was, or that they were involved in an ERAS  
28  
29 program. Many of the patients who were aware of ERAS, however, chose to become more informed prior  
30  
31 to surgery and two participants chose to “get themselves fit” for surgery.  
32  
33

### 34 35 ***Preoperative information from surgeons & nurses***

36  
37 Patients explained that nurses provided the majority of the ERAS information. Surgeons focused on the  
38  
39 understanding of the surgical procedures and knowing what to expect when waking up post-surgery.  
40  
41

42  
43 Many patients perceived that the preoperative information provided came too late.  
44

45  
46 *“Of course, they did inform us about being fit but it was only 4 days before [surgery].”*

47  
48 *“If somebody comes up to you and says ‘well, you should’ve went for walk for the first 3 weeks*  
49  
50 *before your surgery but you can’t tell them that the day of the surgery you have to tell them that*  
51  
52 *way beforehand. Any information you’re going to get that’s going to improve or speed up your*  
53  
54 *recovery 99% of the people in the world are going to do it unless you physically can’t”*  
55  
56  
57  
58  
59  
60

## Stress

Many patients talked about various stressors they encountered while waiting for surgery, such as: 1) Fears about the surgery; 2) Worry about finances, family, work; 3) Bowel preparation for those who had mobility issues or travel before surgery; and 4) Lack of information.

In fact, almost all patients expressed some level of fear and believed that help resolving stressors, including guidance in the access of appropriate services, would have helped them during the waiting period for surgery, and allowed them to go into surgery much calmer and less tired. Patients believed that better pre-surgery physical and mental health equated to a faster recovery. Lack of knowledge of available resources meant few patients even reached out to community services on their own.

*“There is a lot of stress and fear and those things can stop you getting well and healing fast.*

*Should some thought be given to helping patients with stress and fears. Maybe there should be someone who can have a conversation with you so you can talk about all these things and make sure that you are in the best mind to be healed”*

Perceived lack of information regarding the results of preoperative assessments, what the surgeon had planned to do, and how long it would take to recover from the surgery were all pre-surgery stressors. Of note, those who had attended a class or had been able to discuss their surgery with their surgeon or nurses felt more confident going into their surgery in knowing what to expect.

*“... Where the main thrust of learning about ERAS came was meeting the nurses [at the preoperative clinic] who were just godsend. I really look back fondly on that day.”*

## 2. Surgery & stay in-hospital: In-hospital experiences with providers

### Pain control

1  
2  
3 Most participants experienced some level of pain, especially during the first two postoperative days, but  
4  
5 believed that providers controlled their pain level appropriately. A few patients had concerns about  
6  
7 becoming addicted to the pain medication.  
8  
9

10  
11 The pain that surprised many participants was the high level of intraperitoneal gas pain they experienced  
12  
13 as a result of the inflation of the abdomen for laparoscopic surgery. These patients believed they should  
14  
15 have been alerted to this possibility pre-surgery.  
16  
17

18  
19 Patients treated with patient-controlled analgesia appeared to feel good about having some sense of  
20  
21 control over their pain medication and were less anxious than patients who were relying on providers to  
22  
23 administer the drugs. In fact, a few patients feared falling asleep in case their nurse forgot to bring the  
24  
25 medication at the appropriate time.  
26  
27

### 28 **Journal**

29  
30 In a novel approach with ERAS implementation and building upon the McGill experience, Alberta Health  
31  
32 Services adopted the use of journals for patients to track mobility, nutrition, breathing exercises, gum  
33  
34 chewing and urinary output. Many patients who were given a journal to complete daily did not see the  
35  
36 point of the journal and explained that they were too tired or too busy fulfilling the ERAS expectations to  
37  
38 fill out all their journal activities. A few patients said it was helpful, but most felt it was not useful for them,  
39  
40 and believed it was useful for the providers rather than patients.  
41  
42  
43

44  
45 *“The nurses were motivating but I didn’t want to write in the book, I got my mom or girlfriend to do*  
46  
47 *it. Writing in the book was not my priority, walking around helps the bowels more.”*  
48

### 49 **Following ERAS protocols**

50  
51  
52 Patients who had a better understanding of the ERAS program were more likely to follow the expected  
53  
54 protocols. It would appear that fully understanding the rationale for the protocol led to greater adherence.  
55  
56  
57  
58  
59  
60

1  
2  
3 *"I did it, but didn't know why. I think people would be more diligent if they knew why the walking*  
4 *was so important, why the protein was so important..."*  
5  
6  
7  
8

9 Some patients perceived that they were too unwell to follow the program, and explained that their  
10 providers were sticking to the protocol without taking their personal physical health into account. The  
11 inability of providers' to be flexible, or modify the ERAS protocols appeared to engender some anxiety  
12 around the protocols.  
13  
14  
15

16  
17  
18  
19 *"The nurses and doctors were pushing me to eat. I did not understand how important it was to eat*  
20 *as soon as possible. I thought the body needs healing..."*  
21  
22  
23

24 Patients liked the concept of being part of team that was invested in their timely recovery, rather than  
25 simply being told what to do. Being treated as an individual who was doing his/her best, and perceiving  
26 that providers were not simply following rules, allowed patients to invest more effort into following the  
27 protocols.  
28  
29  
30  
31  
32

33  
34  
35 *"...People want to help, and they want to have a sense of belonging, especially in the hospital*  
36 *where you're recovering and going through a tumultuous amount of thoughts... hey we're on this*  
37 *ERAS program, this is what we found helps other patients... and it would help if you did this...that*  
38 *partnership, that team."*  
39  
40  
41  
42

### 43 **Medical care & postoperative health**

44 Although most patients reported an uneventful recovery in hospital, several patients discussed concerns  
45 they had with their postoperative care, which caused undue anxiety and impeded recovery. These  
46 concerns included lack of information around biopsy results, inconsistency in information sharing between  
47 providers at shift changes, perceived mismanagement of nasogastric tubes, and an inability to have a  
48 conversation with their surgeon.  
49  
50  
51  
52

### 53 **Rapport with providers**

54  
55  
56  
57  
58  
59  
60

1  
2  
3 Patients reported that good rapport or relationship with the nursing staff was provider-dependent. Some  
4  
5 nurses were really good at informing and supporting patients as individuals, others were less attentive or  
6  
7 interested. Some nurses were perceived as being focused on following the ERAS protocols independent  
8  
9 of the patient's condition.  
10

### 11 12 13 **3. Surgery & stay in hospital: Non-provider related in-hospital experience**

#### 14 15 **Noise level**

16  
17  
18 Most of the participants complained that the noise level in hospital made it difficult for them to sleep, even  
19  
20 at night, and questioned whether this negatively impacted their recovery. Patients also wondered about  
21  
22 the necessity of having blood samples taken in the middle of the night or very early in the morning.  
23  
24

#### 25 26 **Nutrition**

27  
28 Most patients stated that they would have preferred some guidance about appropriate food for relatives to  
29  
30 bring from home. Patients who had been warned about the postoperative low fibre diet of Alberta Health  
31  
32 Services appeared more forgiving. A few patients noted that there were no food options available  
33  
34 between scheduled mealtimes when they felt prepared to eat.  
35  
36

### 37 38 **4. Managing at home: Discharge and post discharge experiences**

#### 39 40 **Discharge information**

41  
42 Although the majority of patients believed they had adequate discharge information, some participants  
43  
44 raised major concerns that had not been fully explained, including bleeding from the rectum, variation in  
45  
46 bowel movements, and diet. Mixed messages and differing provider advice also caused confusion for  
47  
48 some patients. All of these issues caused varying levels of anxiety for patients' management at home.  
49  
50

51  
52  
53 *"The surgery itself was actually a huge success but they didn't warn me about the number of*  
54  
55 *accidents that I might have or things like that. From what I hear it is fairly common with a lot of*  
56  
57 *people, and that wasn't discussed at all...."*  
58  
59  
60

1  
2  
3  
4  
5 *“Don’t feel that they gave me much information about what to expect [post op]. What is normal or*  
6 *not normal...I experienced a little bit of bleeding. I was kind of concerned about that. It took the*  
7 *nurse [surgeon’s office] quite a while to get back to me on that too”*  
8  
9

10  
11  
12  
13 *“The take home sheet that I had, it did say eat more small meals and make sure you drink a lot of*  
14 *water. Things like that. Helpful hints. I wanted more detail than that.”*  
15  
16

### 17 18 19 **Biopsy and test results**

20  
21 Most patients did not receive their biopsy, or other test, results until their surgical consult six-weeks after  
22 their operation. Many patients were unaware of the necessary time required to review and report these  
23 results, and this caused undue anxiety.  
24  
25  
26  
27

### 28 29 **Medical concerns and home help**

30  
31  
32 Several participants had medical concerns, such as problems with their incision, which caused anxiety,  
33 particularly because there was uncertainty regarding the best service to contact. The few participants who  
34 had needed and received help at home, believed that these providers had not received enough  
35 information from the hospital to be able to support them adequately.  
36  
37  
38  
39

### 40 41 42 **Need for a designated contact when patients go home**

43  
44 Many patients believed it to be necessary to provide an alternate contact besides the surgeons,  
45 physicians, or Health Link (24/7 telephone nurse advice and general health information for Albertans) to  
46 have their concerns addressed. Many hesitated to call their doctors’ offices, especially about diet and  
47 bowel movements, and those who called because of concerns regarding their incision and bleeding  
48 usually waited up to two days to have their questions answered. There was consensus that either a  
49 professional or experienced patient volunteer, who could provide answers or knew where to direct their  
50 concerns, would be an ideal resource for patients managing their recovery at home.  
51  
52  
53  
54  
55  
56  
57  
58  
59  
60

1  
2  
3  
4  
5 "I do think that there should be a follow-up phone call about a week from that enhanced program  
6  
7 itself, not just your doctor...how are things going, do you have any concerns, do you have any  
8  
9 questions..."  
10

### 11 12 13 **Implementation: A patient engagement framework**

14  
15  
16 Recognizing that it is important to learn from patients' experience with ERAS, and use this learning to  
17  
18 move research forward into practice, the ERAS team consulted patient engagement experts to develop a  
19  
20 patient engagement framework. The approach taken to develop this framework was as follows:

- 21  
22
- 23 • A scan of the academic literature regarding patient experiences with ERAS or other similar surgical  
24 programs. A total of 11 articles were determined to be relevant, and reviewed (a comprehensive  
25 literature search and review was beyond the scope of this project).<sup>4,5,17-25</sup>  
26  
27
  - 28 • A scan of the grey literature regarding strategies for engaging surgery patients in quality  
29 improvement and for other patient engagement frameworks.  
30  
31
  - 32 • In-depth review of the present PaCER findings.  
33
  - 34 • Semi-structured, key informant interviews (n=9) were conducted with a purposive sample of four  
35 ERAS nurse coordinators, a PaCER researcher, a patient advisor from the provincial surgery  
36 governing body, a patient experience consultant for Alberta Health Services, and a University of  
37  
38 Calgary-based expert in Patient Reported Experience/Outcome Measures (PROMS/PREMS).  
39  
40  
41  
42

43  
44 A continuum-based framework was developed based on the International Association for Public  
45  
46 Participation (IAP2) spectrum of participation<sup>30</sup> and key guiding principles that emerged from the  
47  
48 framework consultation (Table 2). Patients select their desired level of ERAS involvement along a  
49  
50 continuum of equally valued engagement options from *we inform patients, patients inform us, patients*  
51  
52 *'co-lead' and 'co-design' with us, to patients lead* at the level of being *engaged in their own individual*  
53  
54 *care, the unit care, and the ERAS system.* The highest level of engagement involves *patients as partners*  
55  
56 *and researchers of ERAS.* At this level, patients are meaningfully included as partners in the planning,  
57  
58  
59  
60

1  
2  
3 conduct, and dissemination of research. It is generally acknowledged that no part along this continuum is  
4 inherently 'better' than another part.<sup>28,29</sup> Rather what's important is that there is a good match between  
5 how patients would like to be involved and the opportunities for involvement. Health professionals,  
6 organizations, and patients can use this matrix to identify the extent of patient involvement, and what can  
7 be supported or sustained.  
8  
9  
10  
11

12  
13  
14 There is no value in collecting patient experience and outcome data unless it is going to be used to  
15 influence needed changes across the surgical continuum.<sup>11</sup> At each level, there must be a mechanism to  
16 evaluate outcomes, and a mechanism to disseminate the findings and outcomes to the patients involved,  
17 local ERAS team, hospital and system leaders. Table 4 provides examples of a mechanism to evaluate  
18 and disseminate outcomes at the patient level.  
19  
20  
21  
22  
23

## 24 Discussion

25  
26  
27 The message that patients bring to ERAS is: *if you tell us why, help us understand what we need to do,*  
28 *we will be happy to do all we can.* The findings suggest that patients' perception that they play a major  
29 role within a collaborative ERAS team will improve patient experience and facilitate earlier recovery  
30 through a greater understanding and willingness to adhere to the ERAS in-hospital protocols, and through  
31 confidence in continuing their recovery after discharge. This improved confidence invites patients to co-  
32 create with their ERAS team a patient-centered discharge/recovery plan, which should also reduce the  
33 postoperative burden (e.g., readmissions).  
34  
35  
36  
37  
38  
39  
40  
41  
42

43 A number of our patient findings, such as the desire for greater pre- and postoperative information  
44 provision, have been reported previously,<sup>4-6,31</sup> but have shown little to no change in the ERAS processes.  
45 This failure to implement evidence in practice might represent a gap in the Knowledge-to-Action Cycle.<sup>32</sup>  
46 Our patient findings and the patient engagement framework provide ammunition to encourage the  
47 adoption of a strategy designed to improve patient experiences and outcomes, effectively closing this  
48 gap. Patient input is necessary if patient-centered care is to be operationalized<sup>33,34</sup> and the framework  
49 provides suggestions to engage patients in a systematic process whereby patients are partners in ERAS.  
50 Implementation of the framework, thus, not only provides a means of moving research into practice, but  
51  
52  
53  
54  
55  
56  
57  
58  
59  
60



1  
2  
3 could also improve the patient-orientation of medical decision-making, policy, and future research within  
4 the ERAS system; ultimately, improving the ERAS processes so that the care provided matches patient  
5 values.  
6  
7  
8  
9

10  
11 In addition, our findings highlight the importance of understanding patient experiences of ERAS in order  
12 to improve the experience for future patients. For example, recognition of numerous sources of anxiety as  
13 patients progress along the surgical continuum, can inform development of strategies to address the  
14 emotional, psychological and social stressors that people undergoing serious, often life-changing surgery,  
15 may experience. Attending to these aspects of the surgical journey will contribute to better patient  
16 experiences and outcomes.  
17  
18  
19  
20  
21  
22  
23  
24

25 A strength of the present study is that, through all phases of research, patients were engaged as  
26 partners, and the direction of the research was driven by patient-identified priorities. As a result, we have  
27 identified a number of very practical patient concerns that, if addressed, could enhance patient  
28 experiences with ERAS (Table 5). We have also developed a framework to encourage sustained patient  
29 engagement within the ERAS system (Table 2-4). A clear limitation, as with all qualitative research, is that  
30 the generalizability of the findings may be limited to the participants studied. That said, we collected data  
31 from five hospitals in Alberta and attained diversity in age, gender, and community. Also, our findings are  
32 consistent with the findings of other qualitative studies of ERAS patient experiences<sup>4-7,31</sup>.  
33  
34  
35  
36  
37  
38  
39  
40  
41  
42

43 In conclusion, our findings suggest that patients want to be active participants in their own care. This can  
44 be accomplished by extending the ERAS program to the pre- and postoperative periods and informing  
45 patients of the rationale for each of the ERAS elements. Patients unanimously agreed that if they had fully  
46 understood the benefits, they would pursue the protocols much more vigorously. Patients also require  
47 personalized care and appropriate adaptations within the standardized pathway. Furthermore, patient-led  
48 research provides a unique and powerful opportunity to identify issues that health professionals and  
49 policy-makers may not see. This information can be used to inform development of new strategies to  
50 enhance the patient and family experiences of ERAS.  
51  
52  
53  
54  
55  
56  
57  
58  
59  
60

## References

1. Ljungqvist O, Scott M, Fearon KC. Enhanced Recovery After Surgery: A Review. *JAMA Surg* 2017; Jan 11 [Epub ahead of print]
2. Nelson G, Kiyang L, Crumley E, et al. Implementation of Enhanced Recovery After Surgery(ERAS) Across a Provincial Health Care System: The ERAS Alberta Colorectal surgery Experience. *World J Surg* 2016; 40:1092-103
3. Nguyen T, Chuck A, Wasylak T, et al. An economic evaluation of the Enhanced Recovery After Surgery (ERAS) multi-site implementation program for colorectal surgery in Alberta. *Can J Surg* 2016; 59:6716
4. Blazeby JM, Soulsby M, Winstone K, et al. A qualitative evaluation of patients' experiences of an enhanced recovery programme for colorectal cancer. *Colorectal Dis* 2010;12: e236-42
5. Bernard H, Foss M. Patient experiences of enhanced recovery after surgery (ERAS). *Br J Nurs* 2014; 23: 100-6.
6. Asaa A, Hovback M, Bertoro CM. The importance of preoperative information for patient participation in colorectal surgery care. *J Clin Nurs* 2013; 22:1604-12
7. Sibbern T, Bull Sellevold V, Steindal SA, et al. Patients' Experiences of Enhanced Recovery after Surgery: A systematic review of qualitative studies. *J Clin Nurs* 2016; June 27 [Epub ahead of print]
8. Gustafsson U, Hausel J, Thorell A, et al. Adherence to the Enhanced Recovery After Surgery Protocol and Outcomes After Colorectal Cancer Surgery. *Arch Surg* 2011; 146:571-7
9. Marlett N, Emes C. Grey Matters: A Guide for Collaborative Research with Seniors. Calgary, Alberta: University of Calgary Press, 2010.
10. Anderson M, McCleary KK. From passengers to co-pilots: Patient roles expand. *Sci Transl Med* 2015;7:291fs25
11. Domecq JP, Prutsky G, Elraiyah T, et al. Patient engagement in research: a systematic review. *BMC Health Serv Res* 2014; 14:89
12. Miller JL, Teare SR, Marlett N, et al. Support for Living a Meaningful Life with Osteoarthritis: A Patient-to-Patient Research Study. *Patient* 2016; 9:457-64

- 1  
2  
3  
4  
5  
6  
7  
8  
9  
10  
11  
12  
13  
14  
15  
16  
17  
18  
19  
20  
21  
22  
23  
24  
25  
26  
27  
28  
29  
30  
31  
32  
33  
34  
35  
36  
37  
38  
39  
40  
41  
42  
43  
44  
45  
46  
47  
48  
49  
50  
51  
52  
53  
54  
55  
56  
57  
58  
59  
60
13. Berger, R. Now I see it, now I don't: Researcher's position and reflexivity in qualitative research. *Qualitative Research* 2015; 15: 219-34
  14. Gillard S, Simons L, Turner K, et al. Patient and public involvement in the co-production of knowledge: reflection on the analysis of qualitative data in a mental health study. *Qual Health Res* 2012; 22:1126-37.
  15. Gill M, Bagshaw SM, McKenzie E, et al. Patient and Family Member-Led Research in the Intensive Care Unit: A Novel Approach to Patient-Centered Research. *PLoS One* 2016;11:e0160947
  16. Carter N, Bryant-Lukosius D, DiCenso A, et al. The use of triangulation in qualitative research. *Oncol Nurs Forum* 2014;41:545-7
  17. Archer S, Montague J, Ball A. Exploring the experience of an enhanced recovery programme for gynaecological cancer patients: A qualitative study. *Periop Med(Lond)* 2014; 3:2
  18. Bryan S, Dukes S. The enhanced recovery programme for stoma patients: An audit. *Br J Nurs* 2010; 19: 831-4
  19. Fecher-Jones I, Taylor C. Lived experience, enhanced recovery and laparoscopic colonic resection. *Br J Nurs* 2015; 24:223-8
  20. Kahn S, Wilson T, Ahmed J, et al. Quality of life and patient satisfaction with enhanced recovery protocols. *Colorectal Dis* 2010; 12:1175-82
  21. Norlyk A, Harder I. Recovering at home: Participating in a fast-track colon cancer surgery programme. *Nurs Inq* 2011; 18:165-75
  22. Rymaruk S, Williams J, Kurrimboccus S. Carers' perceptions of the enhanced recovery programme in colorectal surgery. *J Perioper Pract* 2013; 23: 246-50
  23. Short V, Atkinson A, Ness A, et al. Patient experiences of perioperative nutrition within an Enhanced Recovery After Surgery programme for colorectal surgery: A qualitative study. *Colorectal Dis* 2015; 18:O74-O80
  24. Taylor C, Burch J. Feedback on an enhanced recovery programme for colorectal surgery. *Br J Nurs* 2011; 20:286-90

- 1  
2  
3 25. Vandrevalla, T, Senior V, Spring L, et al. "Am I ready to go home?": A qualitative study of patients'  
4 experience of early discharge following an enhanced recovery programme for liver resection  
5 surgery. *Support Care Cancer* 2016; 243: 3447-54.  
6  
7  
8  
9 26. Sheddy A. Handbook on Citizen Engagement: Beyond Consultation. Canadian Policy Research  
10 Network. Retrieved October 2016 from: <http://cprn.org/doc.cfm?doc=1857&l=en>  
11  
12  
13 27. Kovacs Burns K, Bellows M, Eigenseher C et al. Practical' resources to support patient and family  
14 engagement in healthcare decisions: a scoping review. *BMC Health Serv Res* 2014; 14:175  
15  
16  
17 28. Carman KL, Dardess P, Maurer M, et al. Patient and Family Engagement: A Framework for  
18 Understanding the Elements and Developing Interventions and Policies. *Health Aff(Millwood)*  
19 2013; 32: 223-31  
20  
21  
22 29. Alberta Innovates: Patient Engagement Resources. Retrieved October 2016 from  
23 <http://www.aihealthsolutions.ca/initiatives-partnerships/spor/patient-engagement-platform/patient->  
24 [engagement-resources/](http://www.aihealthsolutions.ca/initiatives-partnerships/spor/patient-engagement-platform/patient-)  
25  
26  
27  
28 30. International Association for Public Participation. P2 Practitioner Tools. Retrieved October 2016  
29 from <http://www.iap2.org/?page=A5>  
30  
31  
32 31. Lithner M, Johansson J, Andersson E, et al. Perceived information after surgery for colorectal  
33 cancer - an explorative study. *Colorectal Dis* 2012; 14:1340-50  
34  
35  
36 32. Graham ID, Logan J, Harrison MB, et al: Lost in knowledge translation: time for a map? *J Contin*  
37 *Educ Health Prof* 2006; 26:13–24  
38  
39  
40 33. National Health Service England. Patient and Public Participation Policy. 2015. Retrieved March  
41 2017 from <https://www.england.nhs.uk/participation/resources/docs/>  
42  
43  
44 34. Mockford C, Staniszewska S, Griffiths F, et al. The impact of patient and public involvement on  
45 UK NHS health care: a systematic review. *Int J Qual Health Care* 2012;24: 28-38  
46  
47  
48  
49  
50  
51  
52  
53  
54  
55  
56  
57  
58  
59  
60

1  
2  
3 **Figure 1: Patient and Community Engagement Research methodology**  
4

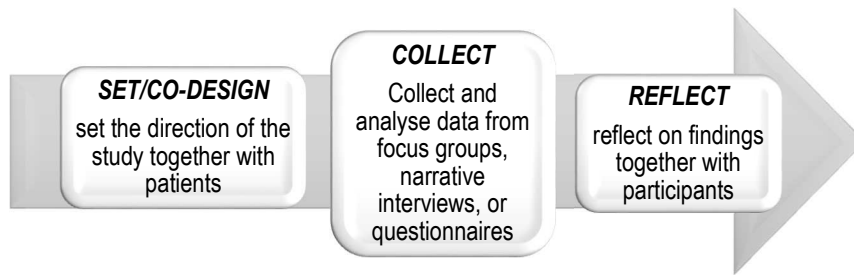

20 **Figure Legend:** The Patient and Community Engagement Research (PaCER) methodology of *Set*,  
21 *Collect*, *Reflect* engages patient-participants as partners throughout the research process.  
22  
23  
24  
25  
26  
27  
28  
29  
30  
31  
32  
33  
34  
35  
36  
37  
38  
39  
40  
41  
42  
43  
44  
45  
46  
47  
48  
49  
50  
51  
52  
53  
54  
55  
56  
57  
58  
59  
60

1  
2  
3  
4  
5  
6  
7  
8  
9  
10  
11  
12  
13  
14  
15  
16  
17  
18  
19  
20  
21  
22  
23  
24  
25  
26  
27  
28  
29  
30  
31  
32  
33  
34  
35  
36  
37  
38  
39  
40  
41  
42  
43  
44  
45  
46  
47  
48  
49  
50  
51  
52  
53  
54  
55  
56  
57  
58  
59  
60

**Figure 2: Patient-defined surgical journey**

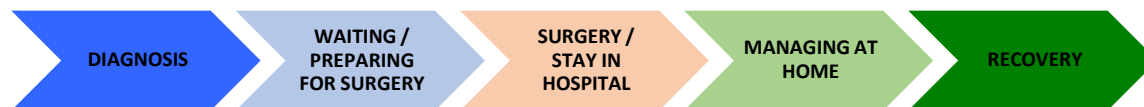

**Figure Legend:** Patient-participants perceived that, to be a program focused on enhanced recovery, the Enhanced Recovery After Surgery program should not be limited to the perioperative period, but should encompass the journey from diagnosis to patient-defined recovery.

For peer review only

Table 1: A patient-driven grounded theory of the ERAS journey

| Patient experiences with an Enhanced Recovery After Surgery (ERAS) program                                                       |                                                                                                                                                                                                                                                                                                                                                                                |
|----------------------------------------------------------------------------------------------------------------------------------|--------------------------------------------------------------------------------------------------------------------------------------------------------------------------------------------------------------------------------------------------------------------------------------------------------------------------------------------------------------------------------|
| Overarching Concept: <i>invite me into ERAS, from diagnosis to recovery, so that I can take responsibility for my own health</i> |                                                                                                                                                                                                                                                                                                                                                                                |
| Category                                                                                                                         | Sub-category                                                                                                                                                                                                                                                                                                                                                                   |
| Waiting & preparing for surgery: Preoperative experiences                                                                        | <ul style="list-style-type: none"> <li>• Knowledge of ERAS</li> <li>• Preoperative information from surgeons &amp; nurses</li> <li>• <u>Stress:</u> <ul style="list-style-type: none"> <li>• Fears about surgery</li> <li>• Worry about finances, family, work</li> <li>• Bowel preparation and travel related stressors</li> </ul> </li> <li>• Lack of information</li> </ul> |
| Surgery & stay in-hospital: In-hospital experiences with providers                                                               | <ul style="list-style-type: none"> <li>• Pain control</li> <li>• Journal</li> <li>• Following ERAS protocol</li> <li>• Medical care &amp; postoperative health</li> <li>• Rapport with providers</li> </ul>                                                                                                                                                                    |
| Surgery & stay in hospital: Non-provider related in-hospital experience                                                          | <ul style="list-style-type: none"> <li>• Noise level</li> <li>• Nutrition</li> </ul>                                                                                                                                                                                                                                                                                           |
| Managing at home: Discharge and post discharge experiences                                                                       | <ul style="list-style-type: none"> <li>• Discharge information</li> <li>• Biopsy test results</li> <li>• Medical concerns &amp; home help</li> <li>• Need for a designated contact</li> </ul>                                                                                                                                                                                  |

Table 2: Key principles to guide patient engagement in ERAS

| Guiding principle                                                                                                                         | Description                                                                                                                                                                                                                                                                                                                         |
|-------------------------------------------------------------------------------------------------------------------------------------------|-------------------------------------------------------------------------------------------------------------------------------------------------------------------------------------------------------------------------------------------------------------------------------------------------------------------------------------|
| 1. "One size will not fit all"                                                                                                            | No single step-by-step process or 'model' for patient engagement can be developed. There is a need to recognize the different cultures and contexts within which ERAS is being implemented; the reality that patients will have different preferences regarding how they want, or are able, to be involved at every level.          |
| 2. Wherever possible, build on existing mechanisms for capturing, analyzing and disseminating patient/family feedback                     | This approach will avoid unnecessary duplication of effort and will be more cost effective. It is recognized, however, that new data collection, analysis, and dissemination approaches may be required.                                                                                                                            |
| 3. Experiences from a broad cross-section of patients should be sought                                                                    | Patients with either very poor or very good experiences, and those with greater resources, are more likely to provide input. In order to capture a broad range of experiences, it is important to identify and address barriers to participation wherever possible.                                                                 |
| 4. Not all illnesses or surgeries are the same, so it may be important to identify subgroups of patients that may have some unique issues | Although there will be some commonalities with respect to patients' experiences with colorectal surgery and ERAS, there may also be differences. For example, patients with inflammatory bowel disease may have some unique issues and needs compared to those with bowel cancer.                                                   |
| 5. Priority should be given to what patients want to tell us, not just what the system wants to hear                                      | While ERAS personnel have many important questions about patient experiences, it is crucial that patients also have open-ended opportunities to talk about issues of importance to them, issues that may not be anticipated by health professionals.                                                                                |
| 6. Nursing units and the ERAS program need to value patient feedback and expertise and be invested in ongoing learning and improvement    | Meaningful patient engagement requires that health care professionals be interested in hearing patient feedback and using it to inform changes in practice and policy. Individual health professionals need to be supported by units and facilities that are invested in and provide supports for ongoing learning and improvement. |
| 7. Patients need to know how their input is being used                                                                                    | Leading in, there is a need to let patients know how their input will be used, and then afterwards it is important to circle back and let patients know the impact of their input.                                                                                                                                                  |
| 8. Patient engagement needs to be resourced if it is to be done well                                                                      | Patient insights can be a core contributor to changes in policy and practice that will result in more positive patient experiences and better outcomes. Patient engagement must be well-resourced in order to optimize its value and contribution.                                                                                  |



Table 3: An 'engaging patients in ERAS' matrix

|                                                                                                                | <b>We inform patients</b>                                                                                                                                                                                                                                                                              | <b>Patients inform us</b>                                                                                                                                                                                                                                                 | <b>Patients 'co-lead' and 'co-design' with us</b>                                                                                                                                           | <b>Patients Lead</b>                                                                                                                                             |
|----------------------------------------------------------------------------------------------------------------|--------------------------------------------------------------------------------------------------------------------------------------------------------------------------------------------------------------------------------------------------------------------------------------------------------|---------------------------------------------------------------------------------------------------------------------------------------------------------------------------------------------------------------------------------------------------------------------------|---------------------------------------------------------------------------------------------------------------------------------------------------------------------------------------------|------------------------------------------------------------------------------------------------------------------------------------------------------------------|
| <b>Individual care level</b><br><i>[Patients are engaged in their own care]</i>                                | -Patients are provided with clear information about ERAS throughout the surgical trajectory, in ways that work for them<br>- Preoperative education information is shared with patients prior to their clinic appointment so that they can ask informed questions<br>-Information needs to be repeated | -Patients tell us what's important to them across the surgical trajectory & this information guides their care                                                                                                                                                            | -Patients are involved in shared decision-making<br>-Patients are involved in the development of mechanisms, such as apps or log books, to track recovery                                   | -Patients make their own decisions based on information & options provided<br>- Patients have the opportunity to talk with peers (e.g., an online support forum) |
| <b>Unit level</b><br><i>[Patients are engaged at the Unit level]</i>                                           | -Nursing unit supports staff in patient education activities.                                                                                                                                                                                                                                          | -Patients provide feedback via short unit-specific surveys, and informal interviews; this information is shared with nursing staff on a consistent and timely basis.<br>-Patients are invited to share their experience at staff meetings.<br>-Unit has a patient council | -Patients are equal members of unit quality-improvement councils, working collaboratively with their health professional colleagues<br>-Patients co-lead unit quality improvement projects  | -Peer supporters work on units to support patient recovery<br>- Peer supporters obtain input from patients on their experience & outcomes                        |
| <b>ERAS initiative level</b><br><i>[Patients are engaged at the ERAS level]</i>                                | -The development and evaluation of ERAS preoperative education modules are informed by what patients need and want                                                                                                                                                                                     | -ERAS database is modified to collect data on PREM/PROMs<br>-Patient research participants are meaningfully involved throughout research processes<br>-ERAS has a patient council                                                                                         | -Patients are members of the local and international ERAS project team<br>-Patients participate in the development of PROMs/PREMs<br>-Patients are members of ERAS education working groups | -Patients are engaged as researchers<br>-Peer support is built into the ERAS initiative as an integral component                                                 |
| <b>The surgical continuum across which patients are engaged extends from diagnosis to recovery</b>             |                                                                                                                                                                                                                                                                                                        |                                                                                                                                                                                                                                                                           |                                                                                                                                                                                             |                                                                                                                                                                  |
| <b>Patients choose how they want to engage - and there is recognition that this may change over time</b>       |                                                                                                                                                                                                                                                                                                        |                                                                                                                                                                                                                                                                           |                                                                                                                                                                                             |                                                                                                                                                                  |
| <b>The knowledge and experiential expertise that patients bring, at each of these levels, is highly valued</b> |                                                                                                                                                                                                                                                                                                        |                                                                                                                                                                                                                                                                           |                                                                                                                                                                                             |                                                                                                                                                                  |

1  
2  
3 PREM refers to patient-reported experience measures; PROM is patient-reported outcome measures.  
4 The cells of the matrix have been populated with some examples of how patients might be involved  
5 across the engagement continuum and at the different levels. These are not meant to be recommended  
6 activities, but are simply illustrative examples of what this kind of engagement could look like. Along the  
7 base of the matrix are three foundational elements of patient engagement: 1) The knowledge and  
8 experiential expertise that patients bring, at each of these levels, is highly valued; 2) Patients choose how  
9 they want to engage and there is recognition that this may change over time; and 3) The surgical  
10 trajectory across which patients are engaged extends from diagnosis to recovery at home  
11  
12  
13  
14  
15  
16  
17  
18  
19  
20  
21  
22  
23  
24  
25  
26  
27  
28  
29  
30  
31  
32  
33  
34  
35  
36  
37  
38  
39  
40  
41  
42  
43  
44  
45  
46  
47  
48  
49  
50  
51  
52  
53  
54  
55  
56  
57  
58  
59  
60

For peer review only

**Table 4: A mechanism for the evaluation and dissemination of outcomes at the individual care level**

|                                           | <b>We inform patients</b>                                                                                         | <b>Patients inform us</b>                                                                                                                                                                                                 | <b>Patients 'co-lead' and 'co-design' with us</b>                                                                                                 | <b>Patients Lead</b>                                                                           |
|-------------------------------------------|-------------------------------------------------------------------------------------------------------------------|---------------------------------------------------------------------------------------------------------------------------------------------------------------------------------------------------------------------------|---------------------------------------------------------------------------------------------------------------------------------------------------|------------------------------------------------------------------------------------------------|
| <b>Evaluation</b><br><i>[Examples]</i>    | -Trivia game online to assess patient understanding of basic ERAS guidelines and principles                       | -A patient satisfaction survey to evaluate education activities<br>-An open-ended section in journal/log book for patients to write about their experience, which can be collected and analyzed using qualitative methods | -Patients use log books, apps, or other mechanisms that work for them to track their own recovery<br>-Patients rate the usefulness of these tools | - Peer supporters obtain input from patients on their experience & outcomes                    |
| <b>Dissemination</b><br><i>[Examples]</i> | -Game results can be tabulated and presented at staff meetings to inform local practice of patient knowledge gaps | - "what's new" section on the ERAS website to provide feedback to patients and public regarding how patient involvement shapes current practice                                                                           | - Recovery tools are modified based on patient feedback and new tools are launched on the ERAS website with a "how-to" video led by patients      | -Peer supporters disseminate their findings at local staff meetings to inform current practice |

The cells of the matrix have been populated with some examples of how evaluation and dissemination of outcomes can be implemented at the individual care level. These are not meant to be recommended activities, but are simply illustrative examples of what this could look like.

**Table 5: Practical recommendations to enhance the patient-orientation of Enhanced Recovery After Surgery (ERAS)**

1. Every ERAS protocol, and the purpose of the protocol, should be fully explained to patients both before surgery and while in-hospital, so that patients can become knowledgeable partners in their recovery.
2. Extend the ERAS program to the pre-surgery phase, so that patients can be ready emotionally, psychologically, and physically for surgery.
3. Extend the ERAS program to the recovery period at home to avoid stressful situations for patients and families.
4. Consider activating a volunteer programme where experienced patients can be available for conversations with new patients.
5. ERAS, and engaging patients in ERAS, is going to look different for different patients and in different contexts (i.e., there is no 'one-size-fits-all' approach). Personalized adaptations within the standardized pathway need to be considered.

## COREQ (CONsolidated criteria for REporting Qualitative research) Checklist

A checklist of items that should be included in reports of qualitative research. You must report the page number in your manuscript where you consider each of the items listed in this checklist. If you have not included this information, either revise your manuscript accordingly before submitting or note N/A.

| Topic                                          | Item No. | Guide Questions/Description                                                                                                                              | Reported on Page No. |
|------------------------------------------------|----------|----------------------------------------------------------------------------------------------------------------------------------------------------------|----------------------|
| <b>Domain 1: Research team and reflexivity</b> |          |                                                                                                                                                          |                      |
| <i>Personal characteristics</i>                |          |                                                                                                                                                          |                      |
| Interviewer/facilitator                        | 1        | Which author/s conducted the interview or focus group?                                                                                                   |                      |
| Credentials                                    | 2        | What were the researcher's credentials? E.g. PhD, MD                                                                                                     |                      |
| Occupation                                     | 3        | What was their occupation at the time of the study?                                                                                                      |                      |
| Gender                                         | 4        | Was the researcher male or female?                                                                                                                       |                      |
| Experience and training                        | 5        | What experience or training did the researcher have?                                                                                                     |                      |
| <i>Relationship with participants</i>          |          |                                                                                                                                                          |                      |
| Relationship established                       | 6        | Was a relationship established prior to study commencement?                                                                                              |                      |
| Participant knowledge of the interviewer       | 7        | What did the participants know about the researcher? e.g. personal goals, reasons for doing the research                                                 |                      |
| Interviewer characteristics                    | 8        | What characteristics were reported about the interviewer/facilitator? e.g. Bias, assumptions, reasons and interests in the research topic                |                      |
| <b>Domain 2: Study design</b>                  |          |                                                                                                                                                          |                      |
| <i>Theoretical framework</i>                   |          |                                                                                                                                                          |                      |
| Methodological orientation and Theory          | 9        | What methodological orientation was stated to underpin the study? e.g. grounded theory, discourse analysis, ethnography, phenomenology, content analysis |                      |
| <i>Participant selection</i>                   |          |                                                                                                                                                          |                      |
| Sampling                                       | 10       | How were participants selected? e.g. purposive, convenience, consecutive, snowball                                                                       |                      |
| Method of approach                             | 11       | How were participants approached? e.g. face-to-face, telephone, mail, email                                                                              |                      |
| Sample size                                    | 12       | How many participants were in the study?                                                                                                                 |                      |
| Non-participation                              | 13       | How many people refused to participate or dropped out? Reasons?                                                                                          |                      |
| <i>Setting</i>                                 |          |                                                                                                                                                          |                      |
| Setting of data collection                     | 14       | Where was the data collected? e.g. home, clinic, workplace                                                                                               |                      |
| Presence of non-participants                   | 15       | Was anyone else present besides the participants and researchers?                                                                                        |                      |
| Description of sample                          | 16       | What are the important characteristics of the sample? e.g. demographic data, date                                                                        |                      |
| <i>Data collection</i>                         |          |                                                                                                                                                          |                      |
| Interview guide                                | 17       | Were questions, prompts, guides provided by the authors? Was it pilot tested?                                                                            |                      |
| Repeat interviews                              | 18       | Were repeat interviews carried out? If yes, how many?                                                                                                    |                      |
| Audio/visual recording                         | 19       | Did the research use audio or visual recording to collect the data?                                                                                      |                      |
| Field notes                                    | 20       | Were field notes made during and/or after the interview or focus group?                                                                                  |                      |
| Duration                                       | 21       | What was the duration of the interviews or focus group?                                                                                                  |                      |
| Data saturation                                | 22       | Was data saturation discussed?                                                                                                                           |                      |
| Transcripts returned                           | 23       | Were transcripts returned to participants for comment and/or                                                                                             |                      |

| Topic                                  | Item No. | Guide Questions/Description                                                                                                        | Reported on Page No. |
|----------------------------------------|----------|------------------------------------------------------------------------------------------------------------------------------------|----------------------|
|                                        |          | correction?                                                                                                                        |                      |
| <b>Domain 3: analysis and findings</b> |          |                                                                                                                                    |                      |
| <i>Data analysis</i>                   |          |                                                                                                                                    |                      |
| Number of data coders                  | 24       | How many data coders coded the data?                                                                                               |                      |
| Description of the coding tree         | 25       | Did authors provide a description of the coding tree?                                                                              |                      |
| Derivation of themes                   | 26       | Were themes identified in advance or derived from the data?                                                                        |                      |
| Software                               | 27       | What software, if applicable, was used to manage the data?                                                                         |                      |
| Participant checking                   | 28       | Did participants provide feedback on the findings?                                                                                 |                      |
| <i>Reporting</i>                       |          |                                                                                                                                    |                      |
| Quotations presented                   | 29       | Were participant quotations presented to illustrate the themes/findings?<br>Was each quotation identified? e.g. participant number |                      |
| Data and findings consistent           | 30       | Was there consistency between the data presented and the findings?                                                                 |                      |
| Clarity of major themes                | 31       | Were major themes clearly presented in the findings?                                                                               |                      |
| Clarity of minor themes                | 32       | Is there a description of diverse cases or discussion of minor themes?                                                             |                      |

Developed from: Tong A, Sainsbury P, Craig J. Consolidated criteria for reporting qualitative research (COREQ): a 32-item checklist for interviews and focus groups. *International Journal for Quality in Health Care*. 2007. Volume 19, Number 6: pp. 349 – 357

**Once you have completed this checklist, please save a copy and upload it as part of your submission. DO NOT include this checklist as part of the main manuscript document. It must be uploaded as a separate file.**

# BMJ Open

## Patients as partners in Enhanced Recovery After Surgery

|                                    |                                                                                                                                                                                                                                                                                                                                                                                                                                                                                                                                                                                                                                                                                                                                                                                                                                                                    |
|------------------------------------|--------------------------------------------------------------------------------------------------------------------------------------------------------------------------------------------------------------------------------------------------------------------------------------------------------------------------------------------------------------------------------------------------------------------------------------------------------------------------------------------------------------------------------------------------------------------------------------------------------------------------------------------------------------------------------------------------------------------------------------------------------------------------------------------------------------------------------------------------------------------|
| Journal:                           | <i>BMJ Open</i>                                                                                                                                                                                                                                                                                                                                                                                                                                                                                                                                                                                                                                                                                                                                                                                                                                                    |
| Manuscript ID                      | bmjopen-2017-017002.R1                                                                                                                                                                                                                                                                                                                                                                                                                                                                                                                                                                                                                                                                                                                                                                                                                                             |
| Article Type:                      | Research                                                                                                                                                                                                                                                                                                                                                                                                                                                                                                                                                                                                                                                                                                                                                                                                                                                           |
| Date Submitted by the Author:      | 18-May-2017                                                                                                                                                                                                                                                                                                                                                                                                                                                                                                                                                                                                                                                                                                                                                                                                                                                        |
| Complete List of Authors:          | Gillis, Chelsia; University of Calgary , Community Health Sciences<br>Gill, Marlyn; University of Calgary, PaCER Innovates<br>Marlett, Nancy; University of Calgary, Community Health Sciences ;<br>University of Calgary , PaCER Innovates<br>Mackean, Gail; University of Calgary, Cumming School of Medicine<br>GermAnn, Kathy; University of Alberta, School of Public Health<br>Gilmour , Loreen; Alberta Health Services, ERAS Alberta<br>Nelson, Gregg; University of Calgary, Oncology and Obstetrics ; University<br>of Calgary, Gynecology<br>Wasylak, Tracy; Alberta Health Services, Strategic Clinical Networks™<br>Nguyen, Susan ; University of Calgary, PaCER Innovates<br>Araujo, Edamil ; University of Calgary, PaCER Innovates<br>Zelinsky, Sandra; University of Calgary, PaCER Innovates<br>Gramlich , Leah; University of Alberta, Medicine |
| <b>Primary Subject<br>Heading</b>: | Patient-centred medicine                                                                                                                                                                                                                                                                                                                                                                                                                                                                                                                                                                                                                                                                                                                                                                                                                                           |
| Secondary Subject Heading:         | Surgery, Qualitative research                                                                                                                                                                                                                                                                                                                                                                                                                                                                                                                                                                                                                                                                                                                                                                                                                                      |
| Keywords:                          | Colorectal surgery < SURGERY, QUALITATIVE RESEARCH, Quality in health<br>care < HEALTH SERVICES ADMINISTRATION & MANAGEMENT                                                                                                                                                                                                                                                                                                                                                                                                                                                                                                                                                                                                                                                                                                                                        |
|                                    |                                                                                                                                                                                                                                                                                                                                                                                                                                                                                                                                                                                                                                                                                                                                                                                                                                                                    |

SCHOLARONE™  
Manuscripts

BMJ

1  
2  
3 **Title:** Patients as partners in Enhanced Recovery After Surgery  
4

5  
6 Gillis C, Gill M, Marlett N, MacKean G, GermAnn K, Gilmour L, Nelson G, Wasylak T, Nguyen S, Araujo  
7  
8 E, Zelinsky S, Gramlich L  
9

10 Chelsia Gillis RD MSc, Cumming School of Medicine, Department of Community Health Sciences,  
11  
12 University of Calgary, Calgary, Alberta, Canada  
13

14  
15 Marlyn Gill MSW, PaCER Innovates, University of Calgary, Calgary, Alberta, Canada  
16

17  
18 Nancy Marlett PhD, Cumming School of Medicine, Department of Community Health Sciences, University  
19  
20 of Calgary, Calgary, Alberta, Canada; PaCER Innovates, University of Calgary, Calgary, Alberta, Canada  
21

22  
23 Gail MacKean MPA, PhD, Cumming School of Medicine, University of Calgary, Calgary, Alberta, Canada  
24

25  
26 Kathy GermAnn, PhD, BScN, School of Public Health, University of Alberta, Edmonton, Alberta, Canada;  
27  
28 Independent Health & Human Services Research & Evaluation Consultant  
29

30  
31 Loreen Gilmour PhD, ERAS Alberta, Alberta Health Services, Alberta, Canada  
32

33  
34 Gregg Nelson MD PhD FRCSC, Departments of Oncology and Obstetrics & Gynecology, Cumming  
35  
36 School of Medicine, University of Calgary, Calgary, Alberta, Canada  
37

38  
39 Tracy Wasylak BN, MSc, CHE, Strategic Clinical Networks™, Alberta Health Services, Alberta, Canada  
40

41  
42 Susan Nguyen, PaCER Innovates, University of Calgary, Calgary, Alberta, Canada  
43

44  
45 Edamil Araujo MSc, PaCER Innovates, University of Calgary, Calgary, Alberta, Canada  
46

47  
48 Sandra Zelinsky, PaCER Innovates, University of Calgary, Calgary, Alberta, Canada  
49

50  
51 Leah Gramlich MD, Department of Medicine, University of Alberta, Edmonton, Alberta, Canada  
52

53 **Corresponding Author:**

54 Chelsia Gillis RD MSc

55  
56 University of Calgary  
57  
58  
59  
60



1  
2  
3 TRW Building

4  
5 3rd Floor

6  
7 3280 Hospital Drive NW

8  
9  
10 Calgary, Alberta CANADA T2N 4Z6

11  
12 chelsia.gillis@ucalgary.ca

13  
14  
15 **Structured Abstract**

16  
17  
18 **Objectives:** Explore the experience of patients undergoing colorectal surgery within an Enhanced  
19 Recovery After Surgery(ERAS) program. Use this experiential data to inform the development of a  
20 framework to support ongoing, meaningful patient engagement in ERAS.  
21  
22

23  
24  
25 **Design:** Qualitative patient-led study using focus groups and narrative interviews. Data were analyzed  
26 iteratively using a Participatory Grounded Theory approach.  
27  
28

29  
30 **Setting:** Five tertiary care centers in Alberta, Canada following the ERAS program.

31  
32 **Participants:** Twenty-seven patients who had undergone colorectal surgery in the last 12 months were  
33 recruited through purposive sampling. Seven patients participated in a co-design focus group to set and  
34 prioritize the research direction. Narrative interviews were conducted with 20 patients.  
35  
36

37  
38 **Results:** Patients perceived that an ERAS program should not be limited to the perioperative period, but  
39 should encompass the journey from diagnosis to recovery. Practical recommendations to improve the  
40 patient experience across the surgical continuum, and enhance patient engagement within ERAS  
41 included:(1) Fully explain every protocol, and the purpose of the protocol, both before surgery and while  
42 in-hospital, so that patients can become knowledgeable partners in their recovery;(2) Extend ERAS  
43 guidelines to the pre-surgery phase, so that patients can be ready emotionally, psychologically and  
44 physically for surgery;(3) Extend ERAS guidelines to the recovery period at home to avoid stressful  
45 situations for patients and families;(4) Consider activating a program where experienced patients can  
46 provide peer support;(5) One-size does not fit all; personalized adaptations within the standardized  
47 pathway are required.  
48  
49  
50  
51  
52  
53  
54  
55  
56  
57  
58  
59  
60

1  
2  
3 Drawing upon this data, and through consultation with ERAS Alberta stakeholders, the ERAS team  
4 developed a matrix to guide sustained patient involvement and action throughout the surgical care  
5 continuum at three levels: individual, unit, and ERAS system.  
6  
7  
8

9  
10 **Conclusion:** This patient-led study generated new insights into the needs of ERAS patients and informed  
11 the development of a framework to improve patient experiences and outcomes.  
12

13  
14 **Article Summary: Strengths and limitations of this study**  
15

- 16  
17 • This is the first patient-led ERAS study, whereby patients were trained to conduct experiential  
18 patient research, to characterize the needs and expectations of patients following ERAS care.  
19
- 20 • Our qualitative findings emerged from participatory grounded theories: a methodology that  
21 involves patients as partners throughout the research process.  
22
- 23 • Patient-led research provides an important link between experiential patient research and  
24 implementation, adding to the foundation of implementation science.  
25
- 26 • We cannot assume that our findings regarding patients' experience with ERAS for colorectal  
27 surgery are representative of all patient experiences with ERAS.  
28  
29  
30  
31  
32  
33

34 **Authorship statement:** All authors meet the ICMJE criteria for authorship. NM, MG, SZ, LG, GN, TW,  
35 LG were involved in the conception and design of the PaCER work. GM and KM conceived, designed,  
36 and wrote the implementation component. MG, NM, SZ, SN, EA were involved with the acquisition,  
37 analysis, and interpretation of data. CG was involved with interpretation of the data and drafted the  
38 manuscript. All authors significantly contributed to the revision of the manuscript and provided final  
39 approval of the manuscript. All authors have agreed to be accountable for all aspects of the work.  
40  
41  
42  
43  
44  
45  
46

47 **Funding statement:** This work was supported by Canadian Institutes of Health Research - Strategy for  
48 Patient-Oriented Research (SPOR) - Patient Engagement - Collaboration Grants (grant number: 258077)  
49  
50

51 **Competing interests statement:** The authors have no competing interest to disclose.  
52  
53

54 **Data sharing statement:** The authors do not have unpublished data to share.  
55  
56  
57  
58  
59  
60

## Introduction

The Enhanced Recovery After Surgery (ERAS) program applies evidence-based perioperative interventions that, collectively, reduce morbidity and length of hospital stay.<sup>1-3</sup> Given its clinical success, a number of qualitative studies have been conducted to provide insight into patient experiences and satisfaction with the program. Overall, a high level of contentment with ERAS has been reported with the exception of a few services: preoperative preparation and postoperative support have been consistently documented as not meeting patient needs.<sup>4-7</sup> Despite these qualitative findings, there has been little change in the pre- and postoperative supportive guidelines.

Patient-centeredness is fundamental to the mission of healthcare, yet traditionally patients have not been involved as partners in shaping their health services. This issue is multifaceted and has real clinical consequences. For instance, central to ERAS' effectiveness, is the adherence to 22 elements,<sup>8</sup> some of which, such as pre-admission oral carbohydrate loading, are completely reliant on patient adherence. A clearer understanding of the patient's perceived and potential role, as well as how to best support patients throughout their surgical journey is an essential first step in mitigating potential patient barriers to successful ERAS implementation. Furthermore, understanding this experience from the patient perspective can highlight issues that health professionals & health systems may not anticipate.

The primary research objective was to explore the experience of patients undergoing colorectal surgery within an ERAS program, in order to develop a better understanding of how the ERAS system currently supports patient needs. Although a number of qualitative studies have addressed patients' experience with ERAS, no studies have been driven by patients, working with patients. Trained patient researchers with relevant surgery experience can effectively engage patient-participants throughout the research process to ensure the findings are relevant and important to the users of ERAS.<sup>9</sup>

In an effort to move beyond the dissemination of our findings, the ERAS team employed patient engagement consultants to develop a patient engagement framework for ERAS; therefore, the research conducted also includes an implementation component, which will be presented as part of the study

1  
2  
3 findings. Building capacity for sustained patient engagement within the existing ERAS system has the  
4 potential to impact medical decision-making, care process across the continuum, the quality of research  
5 conducted, uptake of research findings, adherence to care guidelines, and, ultimately, health  
6 outcomes.<sup>10,11</sup>  
7  
8

## 9 10 11 **Methods**

12  
13 Patient and Community Engagement Researchers (PaCERs) are patients who have been trained to  
14 conduct experiential qualitative research using Participatory Grounded Theory methodology for the  
15 purpose of transforming the role of the patient's health, healthcare, and health research.<sup>9,12</sup> Participatory  
16 Grounded Theory merges participatory research methods with the principles of grounded theory.<sup>13,14</sup> The  
17 PaCER methodology of *Set, Collect, Reflect* (Figure 1) engages patient-participants as partners  
18 throughout every step of the research process for the purpose of developing testable theories based on  
19 real world patient experience. Employing patient-researchers, who have undergone a similar experience  
20 to that of the patient-participants, facilitates an environment whereby participants can be comfortable  
21 uncovering the depths of their own experience, and may reduce the perceived power imbalance between  
22 researcher and interviewee.<sup>15,16</sup>  
23  
24  
25  
26  
27  
28  
29  
30  
31  
32  
33  
34

## 35 *Patients*

36  
37  
38 A total of 27 patients were enrolled between July 2015 and Sept 2016 through purposive sampling from  
39 five hospitals in Alberta, Canada employing the ERAS Alberta Implementation Program for colorectal  
40 surgery.<sup>2</sup> Ethics approval for the PaCER study was obtained by the Conjoint Research Ethics Board.  
41 Patients met inclusion criteria if they had been identified by their surgeons as participants in the ERAS  
42 program, were >18 years of age, and spoke English well enough to participate in a focus group or  
43 interview. All patients were provided with a Consent to Contact Form at their surgeon's office and/or  
44 during their primary hospital admission for surgery. Interested, consented patients were then contacted by  
45 a PaCER researcher who provided further study details. Patients did not have a prior relationship with the  
46 PaCER research team, and were made aware of the study objective. Recruitment was conducted by  
47 telephone and separated into two phases and to generate a sample representative of varied  
48  
49  
50  
51  
52  
53  
54  
55  
56  
57  
58  
59  
60

1  
2  
3 postoperative lengths and experiences. Phase one (n=15) involved recruitment for one focus group (n=7)  
4 and 8 narrative interviews with patients who had undergone surgery in the previous 12 months. To reach  
5 saturation and test emerging themes, we carried out a second phase of recruitment, which consisted of  
6  
7 12 in-hospital interviews and 7 follow-up interviews at three-weeks post-surgery. The sample included 10  
8  
9 females and 17 males, aged 29 to 89 years. None of the patients withdrew from the study. All study  
10  
11 participants signed an informed consent form prior to being interviewed or participating in a focus group.  
12  
13

#### 14 15 16 *Set/Co-Design Focus Group*

17  
18  
19 The *Set* stage is the initial co-design phase of the PaCER methodology.<sup>9</sup> A 5-hour focus group was held  
20  
21 in a private space within the university, with 7 patients representing 4 hospitals, for the purpose of guiding  
22  
23 data collection (i.e., language and scope of responses). The initial question posed to the group was:  
24  
25 *Please tell us about your post- surgery experience while you were in hospital.* This question opened the  
26  
27 door for participants to describe their knowledge of ERAS and recount their experiences coping with the  
28  
29 ERAS protocols. Discussion among the participants was encouraged with a series of prompts used by  
30  
31 trained PaCER researchers to deepen and elaborate the information provided. The focus group was  
32  
33 facilitated audio recorded and transcribed by the PaCER researchers.  
34  
35  
36

37  
38 The topics that emerged included: 1) *How nurses introduced and encouraged the ERAS protocols during*  
39  
40 *the preoperative clinic education appointment and in-hospital; 2) Pre-surgery stress; 3) Surprise at the*  
41  
42 *high level of gas pain; 4) Stress around biopsy results; 5) Nutrition; 6) Level of knowledge of ERAS; 7)*  
43  
44 *Journals* (an ERAS Alberta initiative to get patients to track compliance to ERAS elements not traditionally  
45  
46 included in the ERAS program or within patient charts). These initial ideas were shared with the ERAS  
47  
48 teams and researchers and were used to formulate subsequent guiding questions for the data collection  
49  
50 phase.  
51

#### 52 53 *Data collection / Analysis cycles*

54  
55  
56 Data collection and analysis was conducted according to grounded theory practice, with small groups of  
57  
58 interviews analyzed by three PaCER researchers using open coding methods, in an iterative process to  
59  
60

1  
2  
3 ensure interrogation of the data and emerging themes, as well as to guide the direction of recruitment and  
4 data collection strategies.<sup>9</sup> All PaCER researchers kept a research diary to memo and be reflexive.  
5  
6  
7

8  
9 Narrative interviews encouraged participants to “tell their story”, using prompts sparingly to elicit greater  
10 depth. Once the patient had told the story of their experience, open-ended questions were posed to test  
11 emerging themes. Phase one included 8 individual narrative interviews, in which 5 hospitals were  
12 represented. Phase two included participants from one hospital, in which 12 individual narrative  
13 interviews were conducted on the second postoperative day with 7 follow-up interviews 3-weeks post-  
14 discharge. The interviews conducted at bedside were uninterrupted by non-participants. Data code  
15 saturation was reached after the tenth narrative interview. All interviews were conducted, audio recorded  
16 and transcribed by the PaCER researchers. After each interview and focus group the participants  
17 reflected on what they had learned about their experience and what they thought should be explored in  
18 future interviews. Data collection / analysis cycles with the PaCER team continued until a core construct  
19 emerged that organized the working theory and emerging themes.<sup>9</sup>  
20  
21  
22  
23  
24  
25  
26  
27  
28  
29  
30  
31

### 32 *Reflect*

33  
34 Participants from the interview and co-design phases were invited to *Reflect* on the study findings.<sup>9</sup>  
35 Interested participants (n=7) engaged in a telephone interview to discuss the findings and offer feedback.  
36 This stage tests the truth value and consistency of the findings with the users of the ERAS program.  
37  
38 The net result is a research method that involved patients as partners throughout the research process.  
39  
40 The Inclusion of patients in analysis and interpretation of findings ensures pragmatic and relevant  
41 recommendations. In fact, Participatory Grounded Theory has been used successfully to develop  
42 practice-changing theories to treat osteoarthritis and improve care in the intensive care unit.<sup>12,17</sup>  
43  
44  
45  
46  
47  
48

### 49 *Reliability*

50  
51 Grounded theory methods ensure careful and ongoing interrogation of findings as data is collected and  
52 analyzed. In addition, methods (two distinct methods, three phases of research) and data sources (five  
53 hospitals and in-patient, follow-up interviews) provided a foundation for triangulation of data to enhance  
54  
55  
56  
57  
58  
59  
60

the rigor of the study and breadth of study findings.<sup>18</sup> Research colleagues in ERAS, academic PaCER supervisors and peers were also asked to review and discuss memos, emerging data, coding, and themes to confirm the findings for the purpose of achieving investigator triangulation. Differences among researchers were discussed before coming to a consensus.

## Results

The core concept that emerged from the data was clear: the majority of patients, once they understood the ERAS program, wanted to be included to know why the protocols were important and, most of all, wanted to take on an active, collaborative role throughout their surgical journey. By beginning this partnership early, patients feel better prepared to leave hospital and continue their recovery at home. Thus, the overarching concept is “invite me into ERAS, from diagnosis to recovery, so that I can take responsibility for my own health”. Patients perceived that, to be a program focused on enhanced recovery, ERAS should not be limited to the perioperative period, but should encompass the journey from diagnosis to recovery at home (Figure 2). The results section is therefore divided into four main categories, each with subcategories: (1) Patient preoperative experiences with seven subcategories; (2) In-hospital experiences with providers with five subcategories; (3) Non-provider related in-hospital experiences with 2 subcategories; (4) Post hospital discharge experiences with four subcategories (Table 1).

**Table 1: A patient-driven grounded theory of the ERAS journey**

| <b>Patient experiences with an Enhanced Recovery After Surgery (ERAS) program</b>                                                       |                                                                                                                                                                                                                                                                                                                                                 |
|-----------------------------------------------------------------------------------------------------------------------------------------|-------------------------------------------------------------------------------------------------------------------------------------------------------------------------------------------------------------------------------------------------------------------------------------------------------------------------------------------------|
| <b>Overarching Concept: <i>invite me into ERAS, from diagnosis to recovery, so that I can take responsibility for my own health</i></b> |                                                                                                                                                                                                                                                                                                                                                 |
| <b>Category</b>                                                                                                                         | <b>Sub-category</b>                                                                                                                                                                                                                                                                                                                             |
| Waiting & preparing for surgery: Preoperative experiences                                                                               | <ul style="list-style-type: none"> <li>• Knowledge of ERAS</li> <li>• Preoperative information from surgeons &amp; nurses</li> <li>• <u>Stress:</u> <ul style="list-style-type: none"> <li>• Fears about surgery</li> <li>• Worry about finances, family, work</li> <li>• Bowel preparation and travel related stressors</li> </ul> </li> </ul> |

|                                                                         |                                                                                                                                                                                                             |
|-------------------------------------------------------------------------|-------------------------------------------------------------------------------------------------------------------------------------------------------------------------------------------------------------|
|                                                                         | <ul style="list-style-type: none"> <li>• Lack of information</li> </ul>                                                                                                                                     |
| Surgery & stay in-hospital: In-hospital experiences with providers      | <ul style="list-style-type: none"> <li>• Pain control</li> <li>• Journal</li> <li>• Following ERAS protocol</li> <li>• Medical care &amp; postoperative health</li> <li>• Rapport with providers</li> </ul> |
| Surgery & stay in hospital: Non-provider related in-hospital experience | <ul style="list-style-type: none"> <li>• Noise level</li> <li>• Nutrition</li> </ul>                                                                                                                        |
| Managing at home: Discharge and post discharge experiences              | <ul style="list-style-type: none"> <li>• Discharge information</li> <li>• Biopsy test results</li> <li>• Medical concerns &amp; home help</li> <li>• Need for a designated contact</li> </ul>               |

## 1. Waiting & preparing for surgery: Preoperative experiences

### **Knowledge of ERAS**

More than half of patients interviewed didn't know what ERAS was, or that they were involved in an ERAS program. Many of the patients who were aware of ERAS, however, chose to become more informed prior to surgery and two participants chose to "get themselves fit" for surgery.

### **Preoperative information from surgeons & nurses**

Patients explained that nurses provided the majority of the ERAS information. Surgeons focused on the understanding of the surgical procedures and knowing what to expect when waking up post-surgery.

Many patients perceived that the preoperative information provided came too late.

*"Of course, they did inform us about being fit but it was only 4 days before [surgery]."*

*"If somebody comes up to you and says 'well, you should've went for walk for the first 3 weeks before your surgery but you can't tell them that the day of the surgery you have to tell them that*



1  
2  
3 way beforehand. Any information you're going to get that's going to improve or speed up your  
4 recovery 99% of the people in the world are going to do it unless you physically can't"  
5  
6  
7

## 8 **Stress**

9  
10 Many patients talked about various stressors they encountered while waiting for surgery, such as: 1)  
11 Fears about the surgery; 2) Worry about finances, family, work; 3) Bowel preparation for those who had  
12 mobility issues or travel before surgery; and 4) Lack of information.  
13  
14

15  
16 In fact, almost all patients expressed some level of fear and believed that help resolving stressors,  
17 including guidance in the access of appropriate services, would have helped them during the waiting  
18 period for surgery, and allowed them to go into surgery much calmer and less tired. Patients believed that  
19 better pre-surgery physical and mental health equated to a faster recovery. Lack of knowledge of  
20 available resources meant few patients even reached out to community services on their own.  
21  
22  
23  
24  
25  
26  
27

28 *"There is a lot of stress and fear and those things can stop you getting well and healing fast.*

29 *Should some thought be given to helping patients with stress and fears. Maybe there should be*  
30 *someone who can have a conversation with you so you can talk about all these things and make*  
31 *sure that you are in the best mind to be healed"*  
32  
33  
34  
35  
36

37 Perceived lack of information regarding the results of preoperative assessments, what the surgeon had  
38 planned to do, and how long it would take to recover from the surgery were all pre-surgery stressors. Of  
39 note, those who had attended a class or had been able to discuss their surgery with their surgeon or  
40 nurses felt more confident going into their surgery in knowing what to expect.  
41  
42  
43  
44  
45

46 *"... Where the main thrust of learning about ERAS came was meeting the nurses [at the preoperative*  
47 *clinic] who were just godsend. I really look back fondly on that day."*  
48  
49  
50  
51

## 52 **2. Surgery & stay in-hospital: In-hospital experiences with providers**

### 53 **Pain control**

54  
55  
56  
57  
58  
59  
60

1  
2  
3 Most participants experienced some level of pain, especially during the first two postoperative days, but  
4  
5 believed that providers controlled their pain level appropriately. A few patients had concerns about  
6  
7 becoming addicted to the pain medication.  
8  
9

10 The pain that surprised many participants was the high level of intraperitoneal gas pain they experienced  
11  
12 as a result of the inflation of the abdomen for laparoscopic surgery. These patients believed they should  
13  
14 have been alerted to this possibility pre-surgery.  
15  
16

17 Patients treated with patient-controlled analgesia appeared to feel good about having some sense of  
18  
19 control over their pain medication and were less anxious than patients who were relying on providers to  
20  
21 administer the drugs. In fact, a few patients feared falling asleep in case their nurse forgot to bring the  
22  
23 medication at the appropriate time.  
24  
25

### 26 **Journal**

27  
28 In a novel approach with ERAS implementation and building upon the McGill experience, Alberta Health  
29  
30 Services adopted the use of journals for patients to track mobility, nutrition, breathing exercises, gum  
31  
32 chewing and urinary output. Many patients who were given a journal to complete daily did not see the  
33  
34 point of the journal and explained that they were too tired or too busy fulfilling the ERAS expectations to  
35  
36 fill out all their journal activities. A few patients said it was helpful, but most felt it was not useful for them,  
37  
38 and believed it was useful for the providers rather than patients.  
39  
40

41  
42 *"The nurses were motivating but I didn't want to write in the book, I got my mom or girlfriend to do*  
43  
44 *it. Writing in the book was not my priority, walking around helps the bowels more."*  
45  
46

### 47 **Following ERAS protocols**

48  
49 Patients who had a better understanding of the ERAS program were more likely to follow the expected  
50  
51 protocols. It would appear that fully understanding the rationale for the protocol led to greater adherence.  
52  
53

54  
55 *"I did it, but didn't know why. I think people would be more diligent if they knew why the walking*  
56  
57 *was so important, why the protein was so important..."*  
58  
59  
60

1  
2  
3  
4 Some patients perceived that they were too unwell to follow the program, and explained that their  
5  
6 providers were sticking to the protocol without taking their personal physical health into account. The  
7  
8 inability of providers' to be flexible, or modify the ERAS protocols appeared to engender some anxiety  
9  
10 around the protocols.

11  
12  
13 *"The nurses and doctors were pushing me to eat. I did not understand how important it was to eat*  
14  
15 *as soon as possible. I thought the body needs healing..."*  
16

17  
18 Patients liked the concept of being part of team that was invested in their timely recovery, rather than  
19  
20 simply being told what to do. Being treated as an individual who was doing his/her best, and perceiving  
21  
22 that providers were not simply following rules, allowed patients to invest more effort into following the  
23  
24 protocols.

25  
26  
27 *"...People want to help, and they want to have a sense of belonging, especially in the hospital*  
28  
29 *where you're recovering and going through a tumultuous amount of thoughts... hey we're on this*  
30  
31 *ERAS program, this is what we found helps other patients... and it would help if you did this...that*  
32  
33 *partnership, that team."*  
34

### 35 36 **Medical care & postoperative health**

37  
38 Although most patients reported an uneventful recovery in hospital, several patients discussed concerns  
39  
40 they had with their postoperative care, which caused undue anxiety and impeded recovery. These  
41  
42 concerns included lack of information around biopsy results, inconsistency in information sharing between  
43  
44 providers at shift changes, perceived mismanagement of nasogastric tubes, and an inability to have a  
45  
46 conversation with their surgeon.  
47

### 48 49 **Rapport with providers**

50  
51 Patients reported that good rapport or relationship with the nursing staff was provider-dependent. Some  
52  
53 nurses were really good at informing and supporting patients as individuals, others were less attentive or  
54  
55  
56  
57  
58  
59  
60

1  
2  
3 interested. Some nurses were perceived as being focused on following the ERAS protocols independent  
4 of the patient's condition.  
5  
6  
7

### 8 **3. Surgery & stay in hospital: Non-provider related in-hospital experience**

#### 9 **Noise level**

10  
11  
12 Most of the participants complained that the noise level in hospital made it difficult for them to sleep, even  
13 at night, and questioned whether this negatively impacted their recovery. Patients also wondered about  
14 the necessity of having blood samples taken in the middle of the night or very early in the morning.  
15  
16  
17  
18

#### 19 **Nutrition**

20  
21  
22 Most patients stated that they would have preferred some guidance about appropriate food for relatives to  
23 bring from home. Patients who had been warned about the postoperative low fibre diet of Alberta Health  
24 Services appeared more forgiving. A few patients noted that there were no food options available  
25 between scheduled mealtimes when they felt prepared to eat.  
26  
27  
28  
29  
30  
31

### 32 **4. Managing at home: Discharge and post discharge experiences**

#### 33 **Discharge information**

34  
35  
36 Although the majority of patients believed they had adequate discharge information, some participants  
37 raised major concerns that had not been fully explained, including bleeding from the rectum, variation in  
38 bowel movements, and diet. Mixed messages and differing provider advice also caused confusion for  
39 some patients. All of these issues caused varying levels of anxiety for patients' management at home.  
40  
41  
42  
43  
44

45  
46 *"The surgery itself was actually a huge success but they didn't warn me about the number of*  
47 *accidents that I might have or things like that. From what I hear it is fairly common with a lot of*  
48 *people, and that wasn't discussed at all...."*  
49  
50  
51  
52  
53  
54  
55  
56  
57  
58  
59  
60

1  
2  
3 *“Don’t feel that they gave me much information about what to expect [post op]. What is normal or*  
4 *not normal...I experienced a little bit of bleeding. I was kind of concerned about that. It took the*  
5 *nurse [surgeon’s office] quite a while to get back to me on that too”*  
6  
7  
8

9  
10 *“The take home sheet that I had, it did say eat more small meals and make sure you drink a lot of*  
11 *water. Things like that. Helpful hints. I wanted more detail than that.”*  
12  
13

### 14 **Biopsy and test results**

15  
16  
17  
18 Most patients did not receive their biopsy, or other test, results until their surgical consult six-weeks after  
19 their operation. Many patients were unaware of the necessary time required to review and report these  
20 results, and this caused undue anxiety.  
21  
22

### 23 **Medical concerns and home help**

24  
25  
26  
27 Several participants had medical concerns, such as problems with their incision, which caused anxiety,  
28 particularly because there was uncertainty regarding the best service to contact. The few participants who  
29 had needed and received help at home, believed that these providers had not received enough  
30 information from the hospital to be able to support them adequately.  
31  
32  
33

### 34 **Need for a designated contact when patients go home**

35  
36  
37  
38 Many patients believed it to be necessary to provide an alternate contact besides the surgeons,  
39 physicians, or Health Link (24/7 telephone nurse advice and general health information for Albertans) to  
40 have their concerns addressed. Many hesitated to call their doctors’ offices, especially about diet and  
41 bowel movements, and those who called because of concerns regarding their incision and bleeding  
42 usually waited up to two days to have their questions answered. There was consensus that either a  
43 professional or experienced patient volunteer, who could provide answers or knew where to direct their  
44 concerns, would be an ideal resource for patients managing their recovery at home.  
45  
46  
47  
48  
49  
50  
51  
52  
53  
54  
55  
56  
57  
58  
59  
60

1  
2  
3 "I do think that there should be a follow-up phone call about a week from that enhanced program  
4 itself, not just your doctor...how are things going, do you have any concerns, do you have any  
5 questions..."  
6  
7  
8  
9

### 10 **Implementation: A patient engagement framework**

11  
12  
13 Recognizing that it is important to learn from patients' experience with ERAS, and use this learning to  
14 move research forward into practice, the ERAS team consulted patient engagement experts to develop a  
15 patient engagement framework. The approach taken to develop this framework was as follows:  
16  
17

- 18 • A scan of the academic literature regarding patient experiences with ERAS or other similar surgical  
19 programs. A total of 11 articles were determined to be relevant, and reviewed (a comprehensive  
20 literature search and review was beyond the scope of this project).<sup>4,5,19-27</sup>  
21  
22
- 23 • A scan of the grey literature regarding strategies for engaging surgery patients in quality  
24 improvement and for other patient engagement frameworks.<sup>28-31</sup>  
25  
26
- 27 • In-depth review of the present PaCER findings.  
28  
29
- 30 • Semi-structured, key informant interviews (n=9) were conducted with a purposive sample of four  
31 ERAS nurse coordinators, a PaCER researcher, a patient advisor from the provincial surgery  
32 governing body, a patient experience consultant for Alberta Health Services, and a University of  
33 Calgary-based expert in Patient Reported Experience/Outcome Measures (PROMS/PREMS).  
34  
35  
36  
37  
38  
39

40 A continuum-based framework was developed based on the International Association for Public  
41 Participation (IAP2) spectrum of participation<sup>32</sup> and key guiding principles that emerged from the  
42 framework consultation (Table 2). Patients select their desired level of ERAS involvement along a  
43 continuum of equally valued engagement options from *we inform patients, patients inform us, patients*  
44 *'co-lead' and 'co-design' with us*, to *patients lead* at the level of being *engaged in their own individual*  
45 *care, the unit care, and the ERAS system* (Table 3). The highest level of engagement involves *patients as*  
46 *partners and researchers of ERAS*. At this level, patients are meaningfully included as partners in the  
47 planning, conduct, and dissemination of research. It is generally acknowledged that no part along this  
48 continuum is inherently 'better' than another part.<sup>30,31</sup> Rather what's important is that there is a good  
49  
50  
51  
52  
53  
54  
55  
56  
57  
58  
59  
60

1  
2  
3 match between how patients would like to be involved and the opportunities for involvement. Health  
4 professionals, organizations, and patients can use this matrix to identify the extent of patient involvement,  
5 and what can be supported or sustained.  
6  
7  
8

9  
10 There is no value in collecting patient experience and outcome data unless it is going to be used to  
11 influence needed changes across the surgical continuum.<sup>11</sup> At each level, there must be a mechanism to  
12 evaluate outcomes, and a mechanism to disseminate the findings and outcomes to the patients involved,  
13 local ERAS team, hospital and system leaders. Table 4 provides examples of a mechanism to evaluate  
14 and disseminate outcomes at the patient level.  
15  
16  
17  
18  
19  
20  
21  
22

23 **Table 2: Key principles to guide patient engagement in ERAS**

| Guiding principle                                                                                                                                                                                                         | Description                                                                                                                                                                                                                                                                                                                       |
|---------------------------------------------------------------------------------------------------------------------------------------------------------------------------------------------------------------------------|-----------------------------------------------------------------------------------------------------------------------------------------------------------------------------------------------------------------------------------------------------------------------------------------------------------------------------------|
| <p>24<br/>25<br/>26 <b>1. “One size will not fit all”</b></p>                                                                                                                                                             | <p>No single step-by-step process or ‘model’ for patient engagement can be developed. There is a need to recognize the different cultures and contexts within which ERAS is being implemented; the reality that patients will have different preferences regarding how they want, or are able, to be involved at every level.</p> |
| <p>27<br/>28<br/>29<br/>30<br/>31<br/>32<br/>33 <b>2. Wherever possible, build on existing mechanisms for capturing, analyzing and disseminating patient/family feedback</b></p>                                          | <p>This approach will avoid unnecessary duplication of effort and will be more cost effective. It is recognized, however, that new data collection, analysis, and dissemination approaches may be required.</p>                                                                                                                   |
| <p>34<br/>35<br/>36<br/>37<br/>38<br/>39 <b>3. Experiences from a broad cross-section of patients should be sought</b></p>                                                                                                | <p>Patients with either very poor or very good experiences, and those with greater resources, are more likely to provide input. In order to capture a broad range of experiences, it is important to identify and address barriers to participation wherever possible.</p>                                                        |
| <p>40<br/>41<br/>42<br/>43<br/>44<br/>45<br/>46<br/>47<br/>48<br/>49 <b>4. Not all illnesses or surgeries are the same, so it may be important to identify subgroups of patients that may have some unique issues</b></p> | <p>Although there will be some commonalities with respect to patients’ experiences with colorectal surgery and ERAS, there may also be differences. For example, patients with inflammatory bowel disease may have some unique issues and needs compared to those with bowel cancer.</p>                                          |
| <p>50<br/>51<br/>52<br/>53<br/>54 <b>5. Priority should be given to what patients want to tell us, not just what the system wants to hear</b></p>                                                                         | <p>While ERAS personnel have many important questions about patient experiences, it is crucial that patients also have open-ended opportunities to talk about issues of importance to them, issues that may not be anticipated by health professionals.</p>                                                                       |
| <p>55<br/>56<br/>57<br/>58 <b>6. Nursing units and the ERAS program need to value patient feedback and</b></p>                                                                                                            | <p>Meaningful patient engagement requires that health care professionals be interested in hearing patient feedback and using it to inform changes in practice and policy. Individual</p>                                                                                                                                          |

|                                                                             |                                                                                                                                                                                                                                                    |
|-----------------------------------------------------------------------------|----------------------------------------------------------------------------------------------------------------------------------------------------------------------------------------------------------------------------------------------------|
| <b>expertise and be invested in ongoing learning and improvement</b>        | health professionals need to be supported by units and facilities that are invested in and provide supports for ongoing learning and improvement.                                                                                                  |
| <b>7. Patients need to know how their input is being used</b>               | Leading in, there is a need to let patients know how their input will be used, and then afterwards it is important to circle back and let patients know the impact of their input.                                                                 |
| <b>8. Patient engagement needs to be resourced if it is to be done well</b> | Patient insights can be a core contributor to changes in policy and practice that will result in more positive patient experiences and better outcomes. Patient engagement must be well-resourced in order to optimize its value and contribution. |

**Table 3: An 'engaging patients in ERAS' matrix**

|                                                                                 | <b>We inform patients</b>                                                                                                                                                                                                                                                                              | <b>Patients inform us</b>                                                                                                                                                                                                                                                 | <b>Patients 'co-lead' and 'co-design' with us</b>                                                                                                                                          | <b>Patients Lead</b>                                                                                                                                             |
|---------------------------------------------------------------------------------|--------------------------------------------------------------------------------------------------------------------------------------------------------------------------------------------------------------------------------------------------------------------------------------------------------|---------------------------------------------------------------------------------------------------------------------------------------------------------------------------------------------------------------------------------------------------------------------------|--------------------------------------------------------------------------------------------------------------------------------------------------------------------------------------------|------------------------------------------------------------------------------------------------------------------------------------------------------------------|
| <b>Individual care level</b><br><i>[Patients are engaged in their own care]</i> | -Patients are provided with clear information about ERAS throughout the surgical trajectory, in ways that work for them<br>- Preoperative education information is shared with patients prior to their clinic appointment so that they can ask informed questions<br>-Information needs to be repeated | -Patients tell us what's important to them across the surgical trajectory & this information guides their care                                                                                                                                                            | -Patients are involved in shared decision-making<br>-Patients are involved in the development of mechanisms, such as apps or log books, to track recovery                                  | -Patients make their own decisions based on information & options provided<br>- Patients have the opportunity to talk with peers (e.g., an online support forum) |
| <b>Unit level</b><br><i>[Patients are engaged at the Unit level]</i>            | -Nursing unit supports staff in patient education activities.                                                                                                                                                                                                                                          | -Patients provide feedback via short unit-specific surveys, and informal interviews; this information is shared with nursing staff on a consistent and timely basis.<br>-Patients are invited to share their experience at staff meetings.<br>-Unit has a patient council | -Patients are equal members of unit quality-improvement councils, working collaboratively with their health professional colleagues<br>-Patients co-lead unit quality improvement projects | -Peer supporters work on units to support patient recovery<br>- Peer supporters obtain input from patients on their experience & outcomes                        |
| <b>ERAS initiative level</b><br><i>[Patients are engaged at</i>                 | -The development and evaluation of ERAS preoperative education modules are informed by what                                                                                                                                                                                                            | -ERAS database is modified to collect data on PREM/PROMs<br>-Patient research                                                                                                                                                                                             | -Patients are members of the local and international ERAS project team                                                                                                                     | -Patients are engaged as researchers<br>-Peer support is built into the                                                                                          |



|                                                                                                                |                        |                                                                                                     |                                                                                                                   |                                          |
|----------------------------------------------------------------------------------------------------------------|------------------------|-----------------------------------------------------------------------------------------------------|-------------------------------------------------------------------------------------------------------------------|------------------------------------------|
| <i>the ERAS level]</i>                                                                                         | patients need and want | participants are meaningfully involved throughout research processes<br>-ERAS has a patient council | -Patients participate in the development of PROMs/PREMs<br>-Patients are members of ERAS education working groups | ERAS initiative as an integral component |
| <b>The surgical continuum across which patients are engaged extends from diagnosis to recovery</b>             |                        |                                                                                                     |                                                                                                                   |                                          |
| <b>Patients choose how they want to engage - and there is recognition that this may change over time</b>       |                        |                                                                                                     |                                                                                                                   |                                          |
| <b>The knowledge and experiential expertise that patients bring, at each of these levels, is highly valued</b> |                        |                                                                                                     |                                                                                                                   |                                          |

PREM refers to patient-reported experience measures; PROM is patient-reported outcome measures. The cells of the matrix have been populated with some examples of how patients might be involved across the engagement continuum and at the different levels. These are not meant to be recommended activities, but are simply illustrative examples of what this kind of engagement could look like. Along the base of the matrix are three foundational elements of patient engagement: 1) The knowledge and experiential expertise that patients bring, at each of these levels, is highly valued; 2) Patients choose how they want to engage and there is recognition that this may change over time; and 3) The surgical trajectory across which patients are engaged extends from diagnosis to recovery at home

**Table 4: A mechanism for the evaluation and dissemination of outcomes at the individual care level**

|                                           | <b>We inform patients</b>                                                                                         | <b>Patients inform us</b>                                                                                                                                                                                                 | <b>Patients ‘co-lead’ and ‘co-design’ with us</b>                                                                                                 | <b>Patients Lead</b>                                                                           |
|-------------------------------------------|-------------------------------------------------------------------------------------------------------------------|---------------------------------------------------------------------------------------------------------------------------------------------------------------------------------------------------------------------------|---------------------------------------------------------------------------------------------------------------------------------------------------|------------------------------------------------------------------------------------------------|
| <b>Evaluation</b><br><i>[Examples]</i>    | -Trivia game online to assess patient understanding of basic ERAS guidelines and principles                       | -A patient satisfaction survey to evaluate education activities<br>-An open-ended section in journal/log book for patients to write about their experience, which can be collected and analyzed using qualitative methods | -Patients use log books, apps, or other mechanisms that work for them to track their own recovery<br>-Patients rate the usefulness of these tools | - Peer supporters obtain input from patients on their experience & outcomes                    |
| <b>Dissemination</b><br><i>[Examples]</i> | -Game results can be tabulated and presented at staff meetings to inform local practice of patient knowledge gaps | - “what’s new” section on the ERAS website to provide feedback to patients and public regarding how patient involvement shapes current practice                                                                           | - Recovery tools are modified based on patient feedback and new tools are launched on the ERAS website with a “how-to” video led by patients      | -Peer supporters disseminate their findings at local staff meetings to inform current practice |

1  
2  
3 The cells of the matrix have been populated with some examples of how evaluation and dissemination of  
4 outcomes can be implemented at the individual care level. These are not meant to be recommended  
5 activities, but are simply illustrative examples of what this could look like.  
6  
7

## 8 9 **Discussion**

10 The message that patients bring to ERAS is: *if you tell us why, help us understand what we need to do,*  
11 *we will be happy to do all we can.* The findings suggest that patients' perception that they play a major  
12 role within a collaborative ERAS team will improve patient experience and facilitate earlier recovery  
13 through a greater understanding and willingness to adhere to the ERAS in-hospital protocols, and through  
14 confidence in continuing their recovery after discharge. This improved confidence invites patients to co-  
15 create with their ERAS team a patient-centered discharge/recovery plan, which should also reduce the  
16 postoperative burden (e.g., readmissions).  
17  
18  
19  
20  
21  
22  
23

24  
25  
26 A number of our patient findings, such as the desire for greater pre- and postoperative information  
27 provision, have been reported previously,<sup>4-6,33</sup> but have shown little to no change in the ERAS processes.  
28 This failure to implement evidence in practice might represent a gap in the Knowledge-to-Action Cycle.<sup>34</sup>  
29 Our patient findings and the patient engagement framework provide ammunition to encourage the  
30 adoption of a strategy designed to improve patient experiences and outcomes, effectively closing this  
31 gap. Patient input is necessary if patient-centered care is to be operationalized<sup>35,36</sup> and the framework  
32 provides suggestions to engage patients in a systematic process whereby patients are partners in ERAS.  
33 Implementation of the framework, thus, not only provides a means of moving research into practice, but  
34 could also improve the patient-orientation of medical decision-making, policy, and future research within  
35 the ERAS system; ultimately, improving the ERAS processes so that the care provided matches patient  
36 values.  
37  
38  
39  
40  
41  
42  
43  
44  
45  
46  
47  
48  
49

50 In addition, our findings highlight the importance of understanding patient experiences of ERAS in order  
51 to improve the experience for future patients. For example, recognition of numerous sources of anxiety as  
52 patients progress along the surgical continuum, can inform development of strategies to address the  
53 emotional, psychological and social stressors that people undergoing serious, often life-changing surgery,  
54  
55  
56  
57  
58  
59  
60

1  
2  
3 may experience. Attending to these aspects of the surgical journey will contribute to better patient  
4 experiences and outcomes.  
5  
6  
7

8  
9 A strength of the present study is that, through all phases of research, patients were engaged as  
10 partners, and the direction of the research was driven by patient-identified priorities. As a result, we have  
11 identified a number of very practical patient concerns that, if addressed, could enhance patient  
12 experiences with ERAS (Table 5). We have also developed a framework to encourage sustained patient  
13 engagement within the ERAS system (Table 2-4). A clear limitation, as with all qualitative research, is that  
14 the generalizability of the findings may be limited to the participants studied. That said, we collected data  
15 from five hospitals in Alberta and attained diversity in age, gender, and community. Also, our findings are  
16 consistent with the findings of other qualitative studies of ERAS patient experiences<sup>4-7,33</sup>.  
17  
18  
19  
20  
21  
22  
23  
24  
25  
26

27 **Table 5: Practical recommendations to enhance the patient-orientation of Enhanced Recovery**  
28 **After Surgery (ERAS)**  
29

- |                                                                                                                                                                                                                                                                                                                                                                                                                                                                                                                                                                                                                                                                                                                                                                                                                                                                                                                                                            |
|------------------------------------------------------------------------------------------------------------------------------------------------------------------------------------------------------------------------------------------------------------------------------------------------------------------------------------------------------------------------------------------------------------------------------------------------------------------------------------------------------------------------------------------------------------------------------------------------------------------------------------------------------------------------------------------------------------------------------------------------------------------------------------------------------------------------------------------------------------------------------------------------------------------------------------------------------------|
| <p>30 1. Every ERAS protocol, and the purpose of the protocol, should be fully explained to patients both<br/>31 before surgery and while in-hospital, so that patients can become knowledgeable partners in their<br/>32 recovery.<br/>33 2. Extend the ERAS program to the pre-surgery phase, so that patients can be ready emotionally,<br/>34 psychologically, and physically for surgery.<br/>35 3. Extend the ERAS program to the recovery period at home to avoid stressful situations for patients<br/>36 and families.<br/>37 4. Consider activating a volunteer programme where experienced patients can be available for<br/>38 conversations with new patients.<br/>39 5. ERAS, and engaging patients in ERAS, is going to look different for different patients and in different<br/>40 contexts (i.e., there is no 'one-size-fits-all' approach). Personalized adaptations within the standardized<br/>41 pathway need to be considered.</p> |
|------------------------------------------------------------------------------------------------------------------------------------------------------------------------------------------------------------------------------------------------------------------------------------------------------------------------------------------------------------------------------------------------------------------------------------------------------------------------------------------------------------------------------------------------------------------------------------------------------------------------------------------------------------------------------------------------------------------------------------------------------------------------------------------------------------------------------------------------------------------------------------------------------------------------------------------------------------|

42  
43 In conclusion, our findings suggest that patients want to be active participants in their own care. This can  
44 be accomplished by extending the ERAS program to the pre- and postoperative periods and informing  
45 patients of the rationale for each of the ERAS elements. Patients unanimously agreed that if they had fully  
46 understood the benefits, they would pursue the protocols much more vigorously. Patients also require  
47 personalized care and appropriate adaptations within the standardized pathway. Furthermore, patient-led  
48 research provides a unique and powerful opportunity to identify issues that health professionals and  
49 policy-makers may not see. This information can be used to inform development of new strategies to  
50 enhance the patient and family experiences of ERAS.  
51  
52  
53  
54  
55  
56  
57  
58  
59  
60

## References

1. Ljungqvist O, Scott M, Fearon KC. Enhanced Recovery After Surgery: A Review. *JAMA Surg* 2017; Jan 11 [Epub ahead of print]
2. Nelson G, Kiyang L, Crumley E, et al. Implementation of Enhanced Recovery After Surgery(ERAS) Across a Provincial Health Care System: The ERAS Alberta Colorectal surgery Experience. *World J Surg* 2016; 40:1092-103
3. Nguyen T, Chuck A, Wasylak T, et al. An economic evaluation of the Enhanced Recovery After Surgery (ERAS) multi-site implementation program for colorectal surgery in Alberta. *Can J Surg* 2016; 59:6716
4. Blazeby JM, Soulsby M, Winstone K, et al. A qualitative evaluation of patients' experiences of an enhanced recovery programme for colorectal cancer. *Colorectal Dis* 2010;12: e236-42
5. Bernard H, Foss M. Patient experiences of enhanced recovery after surgery (ERAS). *Br J Nurs* 2014; 23: 100-6.
6. Asaa A, Hovback M, Bertoro CM. The importance of preoperative information for patient participation in colorectal surgery care. *J Clin Nurs* 2013; 22:1604-12
7. Sibbern T, Bull Sellevold V, Steindal SA, et al. Patients' Experiences of Enhanced Recovery after Surgery: A systematic review of qualitative studies. *J Clin Nurs* 2016; June 27 [Epub ahead of print]
8. Gustafsson U, Hausel J, Thorell A, et al. Adherence to the Enhanced Recovery After Surgery Protocol and Outcomes After Colorectal Cancer Surgery. *Arch Surg* 2011; 146:571-7
9. Marlett N, Emes C. Grey Matters: A Guide for Collaborative Research with Seniors. Calgary, Alberta: University of Calgary Press, 2010.
10. Anderson M, McCleary KK. From passengers to co-pilots: Patient roles expand. *Sci Transal Med* 2015;7:291fs25
11. Domecq JP, Prutsky G, Elraiyah T, et al. Patient engagement in research: a systematic review. *BMC Health Serv Res* 2014; 14:89
12. Miller JL, Teare SR, Marlett N, et al. Support for Living a Meaningful Life with Osteoarthritis: A Patient-to-Patient Research Study. *Patient* 2016; 9:457-64

- 1  
2  
3 13. Simmons OE, Gregory TA. Grounded action: Achieving optimal and sustainable change. *Forum:*  
4  
5 *Qualitative Social Research* 2003;4: 27  
6
- 7 14. Teram E, Schachter CL, Stalker CA. The case for integrating grounded theory and participatory  
8  
9 action research: empowering clients to inform professional practice. *Qual Health Res* 2005;  
10  
11 15:1129-40  
12
- 13 15. Berger, R. Now I see it, now I don't: Researcher's position and reflexivity in qualitative research.  
14  
15 *Qualitative Research* 2015; 15: 219-34  
16
- 17 16. Gillard S, Simons L, Turner K, et al. Patient and public involvement in the co-production of  
18  
19 knowledge: reflection on the analysis of qualitative data in a mental health study. *Qual Health Res*  
20  
21 2012; 22:1126-37  
22
- 23 17. Gill M, Bagshaw SM, McKenzie E, et al. Patient and Family Member-Led Research in the  
24  
25 Intensive Care Unit: A Novel Approach to Patient-Centered Research. *PLoS One*  
26  
27 2016;11:e0160947  
28
- 29 18. Carter N, Bryant-Lukosius D, DiCenso A, et al. The use of triangulation in qualitative research.  
30  
31 *Oncol Nurs Forum* 2014;41:545-7  
32
- 33 19. Archer S, Montague J, Ball A. Exploring the experience of an enhanced recovery programme for  
34  
35 gynaecological cancer patients: A qualitative study. *Periop Med(Lond)* 2014; 3:2  
36
- 37 20. Bryan S, Dukes S. The enhanced recovery programme for stoma patients: An audit. *Br J Nurs*  
38  
39 2010; 19: 831-4  
40
- 41 21. Fecher-Jones I, Taylor C. Lived experience, enhanced recovery and laparoscopic colonic  
42  
43 resection. *Br J Nurs* 2015; 24:223-8  
44
- 45 22. Kahn S, Wilson T, Ahmed J, et al. Quality of life and patient satisfaction with enhanced recovery  
46  
47 protocols. *Colorectal Dis* 2010; 12:1175-82  
48
- 49 23. Norlyk A, Harder I. Recovering at home: Participating in a fast-track colon cancer surgery  
50  
51 programme. *Nurs Inq* 2011; 18:165-75  
52
- 53 24. Rymaruk S, Williams J, Kurrimboccus S. Carers' perceptions of the enhanced recovery  
54  
55 programme in colorectal surgery. *J Perioper Pract* 2013; 23: 246-50  
56  
57  
58  
59  
60

- 1  
2  
3 25. Short V, Atkinson A, Ness A, et al. Patient experiences of perioperative nutrition within an  
4  
5 Enhanced Recovery After Surgery programme for colorectal surgery: A qualitative study.  
6  
7 *Colorectal Dis* 2015; 18:O74-O80  
8
- 9 26. Taylor C, Burch J. Feedback on an enhanced recovery programme for colorectal surgery. *Br J*  
10  
11 *Nurs* 2011; 20:286-90  
12
- 13 27. Vandrevalla, T, Senior V, Spring L, et al. "Am I ready to go home?": A qualitative study of patients'  
14  
15 experience of early discharge following an enhanced recovery programme for liver resection  
16  
17 surgery. *Support Care Cancer* 2016; 243: 3447-54.  
18
- 19 28. Sheddy A. Handbook on Citizen Engagement: Beyond Consultation. Canadian Policy Research  
20  
21 Network. Retrieved October 2016 from: <http://cprn.org/doc.cfm?doc=1857&l=en>  
22
- 23 29. Kovacs Burns K, Bellows M, Eigenseher C et al. Practical' resources to support patient and family  
24  
25 engagement in healthcare decisions: a scoping review. *BMC Health Serv Res* 2014; 14:175  
26
- 27 30. Carman KL, Dardess P, Maurer M, et al. Patient and Family Engagement: A Framework for  
28  
29 Understanding the Elements and Developing Interventions and Policies. *Health Aff(Millwood)*  
30  
31 2013; 32: 223-31  
32
- 33 31. Alberta Innovates: Patient Engagement Resources. Retrieved October 2016 from  
34  
35 <http://www.aihealthsolutions.ca/initiatives-partnerships/spor/patient-engagement-platform/patient->  
36  
37 [engagement-resources/](http://www.aihealthsolutions.ca/initiatives-partnerships/spor/patient-engagement-platform/patient-)  
38
- 39 32. International Association for Public Participation. P2 Practitioner Tools. Retrieved October 2016  
40  
41 from <http://www.iap2.org/?page=A5>  
42
- 43 33. Lithner M, Johansson J, Andersson E, et al. Perceived information after surgery for colorectal  
44  
45 cancer - an explorative study. *Colorectal Dis* 2012; 14:1340-50  
46
- 47 34. Graham ID, Logan J, Harrison MB, et al: Lost in knowledge translation: time for a map? *J Contin*  
48  
49 *Educ Health Prof* 2006; 26:13-24  
50
- 51 35. National Health Service England. Patient and Public Participation Policy. 2015. Retrieved March  
52  
53 2017 from <https://www.england.nhs.uk/participation/resources/docs/>  
54
- 55 36. Mockford C, Staniszewska S, Griffiths F, et al. The impact of patient and public involvement on  
56  
57 UK NHS health care: a systematic review. *Int J Qual Health Care* 2012;24: 28-38  
58  
59  
60

1  
2  
3 **Figure Legends**  
4

5 **Figure 1:** The Patient and Community Engagement Research (PaCER) methodology of *Set, Collect,*  
6  
7 *Reflect* engages patient-participants as partners throughout the research process.  
8

9  
10 **Figure 2 - Patient-defined surgical journey:** Patient-participants perceived that, to be a program  
11  
12 focused on enhanced recovery, the Enhanced Recovery After Surgery program should not be limited to  
13  
14 the perioperative period, but should encompass the journey from diagnosis to patient-defined recovery.  
15  
16  
17  
18  
19  
20  
21  
22  
23  
24  
25  
26  
27  
28  
29  
30  
31  
32  
33  
34  
35  
36  
37  
38  
39  
40  
41  
42  
43  
44  
45  
46  
47  
48  
49  
50  
51  
52  
53  
54  
55  
56  
57  
58  
59  
60

For peer review only

1  
2  
3  
4  
5  
6  
7  
8  
9  
10  
11  
12  
13  
14  
15  
16  
17  
18  
19  
20  
21  
22  
23  
24  
25  
26  
27  
28  
29  
30  
31  
32  
33  
34  
35  
36  
37  
38  
39  
40  
41  
42  
43  
44  
45  
46  
47  
48  
49  
50  
51  
52  
53  
54  
55  
56  
57  
58  
59  
60

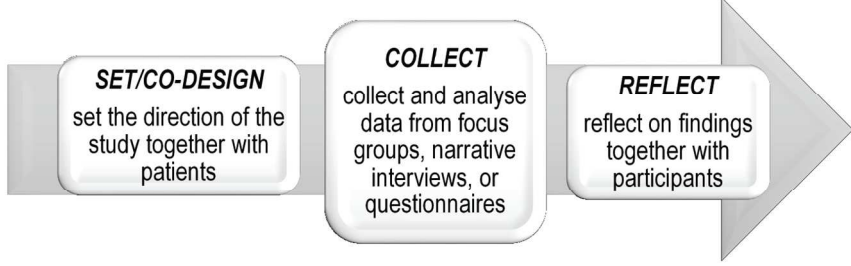

peer review only



1  
2  
3  
4  
5  
6  
7  
8  
9  
10  
11  
12  
13  
14  
15  
16  
17  
18  
19  
20  
21  
22  
23  
24  
25  
26  
27  
28  
29  
30  
31  
32  
33  
34  
35  
36  
37  
38  
39  
40  
41  
42  
43  
44  
45  
46  
47  
48  
49  
50  
51  
52  
53  
54  
55  
56  
57  
58  
59  
60

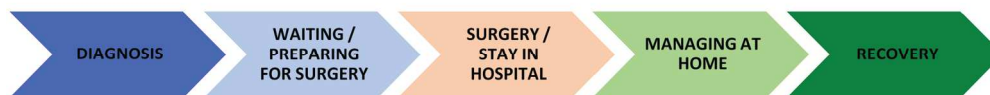

For peer review only

## COREQ (COnsolidated criteria for REporting Qualitative research) Checklist

A checklist of items that should be included in reports of qualitative research. You must report the page number in your manuscript where you consider each of the items listed in this checklist. If you have not included this information, either revise your manuscript accordingly before submitting or note N/A.

| Topic                                          | Item No. | Guide Questions/Description                                                                                                                              | Reported on Page No. |
|------------------------------------------------|----------|----------------------------------------------------------------------------------------------------------------------------------------------------------|----------------------|
| <b>Domain 1: Research team and reflexivity</b> |          |                                                                                                                                                          |                      |
| <i>Personal characteristics</i>                |          |                                                                                                                                                          |                      |
| Interviewer/facilitator                        | 1        | Which author/s conducted the interview or focus group?                                                                                                   |                      |
| Credentials                                    | 2        | What were the researcher's credentials? E.g. PhD, MD                                                                                                     |                      |
| Occupation                                     | 3        | What was their occupation at the time of the study?                                                                                                      |                      |
| Gender                                         | 4        | Was the researcher male or female?                                                                                                                       |                      |
| Experience and training                        | 5        | What experience or training did the researcher have?                                                                                                     |                      |
| <i>Relationship with participants</i>          |          |                                                                                                                                                          |                      |
| Relationship established                       | 6        | Was a relationship established prior to study commencement?                                                                                              |                      |
| Participant knowledge of the interviewer       | 7        | What did the participants know about the researcher? e.g. personal goals, reasons for doing the research                                                 |                      |
| Interviewer characteristics                    | 8        | What characteristics were reported about the interviewer/facilitator? e.g. Bias, assumptions, reasons and interests in the research topic                |                      |
| <b>Domain 2: Study design</b>                  |          |                                                                                                                                                          |                      |
| <i>Theoretical framework</i>                   |          |                                                                                                                                                          |                      |
| Methodological orientation and Theory          | 9        | What methodological orientation was stated to underpin the study? e.g. grounded theory, discourse analysis, ethnography, phenomenology, content analysis |                      |
| <i>Participant selection</i>                   |          |                                                                                                                                                          |                      |
| Sampling                                       | 10       | How were participants selected? e.g. purposive, convenience, consecutive, snowball                                                                       |                      |
| Method of approach                             | 11       | How were participants approached? e.g. face-to-face, telephone, mail, email                                                                              |                      |
| Sample size                                    | 12       | How many participants were in the study?                                                                                                                 |                      |
| Non-participation                              | 13       | How many people refused to participate or dropped out? Reasons?                                                                                          |                      |
| <i>Setting</i>                                 |          |                                                                                                                                                          |                      |
| Setting of data collection                     | 14       | Where was the data collected? e.g. home, clinic, workplace                                                                                               |                      |
| Presence of non-participants                   | 15       | Was anyone else present besides the participants and researchers?                                                                                        |                      |
| Description of sample                          | 16       | What are the important characteristics of the sample? e.g. demographic data, date                                                                        |                      |
| <i>Data collection</i>                         |          |                                                                                                                                                          |                      |
| Interview guide                                | 17       | Were questions, prompts, guides provided by the authors? Was it pilot tested?                                                                            |                      |
| Repeat interviews                              | 18       | Were repeat interviews carried out? If yes, how many?                                                                                                    |                      |
| Audio/visual recording                         | 19       | Did the research use audio or visual recording to collect the data?                                                                                      |                      |
| Field notes                                    | 20       | Were field notes made during and/or after the interview or focus group?                                                                                  |                      |
| Duration                                       | 21       | What was the duration of the interviews or focus group?                                                                                                  |                      |
| Data saturation                                | 22       | Was data saturation discussed?                                                                                                                           |                      |
| Transcripts returned                           | 23       | Were transcripts returned to participants for comment and/or                                                                                             |                      |

| Topic                                  | Item No. | Guide Questions/Description                                                                                                        | Reported on Page No. |
|----------------------------------------|----------|------------------------------------------------------------------------------------------------------------------------------------|----------------------|
|                                        |          | correction?                                                                                                                        |                      |
| <b>Domain 3: analysis and findings</b> |          |                                                                                                                                    |                      |
| <i>Data analysis</i>                   |          |                                                                                                                                    |                      |
| Number of data coders                  | 24       | How many data coders coded the data?                                                                                               |                      |
| Description of the coding tree         | 25       | Did authors provide a description of the coding tree?                                                                              |                      |
| Derivation of themes                   | 26       | Were themes identified in advance or derived from the data?                                                                        |                      |
| Software                               | 27       | What software, if applicable, was used to manage the data?                                                                         |                      |
| Participant checking                   | 28       | Did participants provide feedback on the findings?                                                                                 |                      |
| <i>Reporting</i>                       |          |                                                                                                                                    |                      |
| Quotations presented                   | 29       | Were participant quotations presented to illustrate the themes/findings?<br>Was each quotation identified? e.g. participant number |                      |
| Data and findings consistent           | 30       | Was there consistency between the data presented and the findings?                                                                 |                      |
| Clarity of major themes                | 31       | Were major themes clearly presented in the findings?                                                                               |                      |
| Clarity of minor themes                | 32       | Is there a description of diverse cases or discussion of minor themes?                                                             |                      |

Developed from: Tong A, Sainsbury P, Craig J. Consolidated criteria for reporting qualitative research (COREQ): a 32-item checklist for interviews and focus groups. *International Journal for Quality in Health Care*. 2007. Volume 19, Number 6: pp. 349 – 357

**Once you have completed this checklist, please save a copy and upload it as part of your submission. DO NOT include this checklist as part of the main manuscript document. It must be uploaded as a separate file.**

# BMJ Open

## Patients as partners in Enhanced Recovery After Surgery: A qualitative patient-led study

|                                    |                                                                                                                                                                                                                                                                                                                                                                                                                                                                                                                                                                                                                                                                                                                                                                                                                                                                    |
|------------------------------------|--------------------------------------------------------------------------------------------------------------------------------------------------------------------------------------------------------------------------------------------------------------------------------------------------------------------------------------------------------------------------------------------------------------------------------------------------------------------------------------------------------------------------------------------------------------------------------------------------------------------------------------------------------------------------------------------------------------------------------------------------------------------------------------------------------------------------------------------------------------------|
| Journal:                           | <i>BMJ Open</i>                                                                                                                                                                                                                                                                                                                                                                                                                                                                                                                                                                                                                                                                                                                                                                                                                                                    |
| Manuscript ID                      | bmjopen-2017-017002.R2                                                                                                                                                                                                                                                                                                                                                                                                                                                                                                                                                                                                                                                                                                                                                                                                                                             |
| Article Type:                      | Research                                                                                                                                                                                                                                                                                                                                                                                                                                                                                                                                                                                                                                                                                                                                                                                                                                                           |
| Date Submitted by the Author:      | 26-May-2017                                                                                                                                                                                                                                                                                                                                                                                                                                                                                                                                                                                                                                                                                                                                                                                                                                                        |
| Complete List of Authors:          | Gillis, Chelsia; University of Calgary , Community Health Sciences<br>Gill, Marlyn; University of Calgary, PaCER Innovates<br>Marlett, Nancy; University of Calgary, Community Health Sciences ;<br>University of Calgary , PaCER Innovates<br>Mackean, Gail; University of Calgary, Cumming School of Medicine<br>GermAnn, Kathy; University of Alberta, School of Public Health<br>Gilmour , Loreen; Alberta Health Services, ERAS Alberta<br>Nelson, Gregg; University of Calgary, Oncology and Obstetrics ; University<br>of Calgary, Gynecology<br>Wasylak, Tracy; Alberta Health Services, Strategic Clinical Networks™<br>Nguyen, Susan ; University of Calgary, PaCER Innovates<br>Araujo, Edamil ; University of Calgary, PaCER Innovates<br>Zelinsky, Sandra; University of Calgary, PaCER Innovates<br>Gramlich , Leah; University of Alberta, Medicine |
| <b>Primary Subject<br>Heading</b>: | Patient-centred medicine                                                                                                                                                                                                                                                                                                                                                                                                                                                                                                                                                                                                                                                                                                                                                                                                                                           |
| Secondary Subject Heading:         | Surgery, Qualitative research                                                                                                                                                                                                                                                                                                                                                                                                                                                                                                                                                                                                                                                                                                                                                                                                                                      |
| Keywords:                          | Colorectal surgery < SURGERY, QUALITATIVE RESEARCH, Quality in health<br>care < HEALTH SERVICES ADMINISTRATION & MANAGEMENT                                                                                                                                                                                                                                                                                                                                                                                                                                                                                                                                                                                                                                                                                                                                        |
|                                    |                                                                                                                                                                                                                                                                                                                                                                                                                                                                                                                                                                                                                                                                                                                                                                                                                                                                    |

SCHOLARONE™  
Manuscripts

1  
2  
3 **Title:** Patients as partners in Enhanced Recovery After Surgery: A qualitative patient-led study  
4

5  
6 Gillis C, Gill M, Marlett N, MacKean G, GermAnn K, Gilmour L, Nelson G, Wasylak T, Nguyen S, Araujo  
7  
8 E, Zelinsky S, Gramlich L  
9

10 Chelsia Gillis RD MSc, Cumming School of Medicine, Department of Community Health Sciences,  
11  
12 University of Calgary, Calgary, Alberta, Canada  
13

14  
15 Marlyn Gill MSW, PaCER Innovates, University of Calgary, Calgary, Alberta, Canada  
16

17  
18 Nancy Marlett PhD, Cumming School of Medicine, Department of Community Health Sciences, University  
19  
20 of Calgary, Calgary, Alberta, Canada; PaCER Innovates, University of Calgary, Calgary, Alberta, Canada  
21

22  
23 Gail MacKean MPA, PhD, Cumming School of Medicine, University of Calgary, Calgary, Alberta, Canada  
24

25  
26 Kathy GermAnn, PhD, BScN, School of Public Health, University of Alberta, Edmonton, Alberta, Canada;  
27  
28 Independent Health & Human Services Research & Evaluation Consultant  
29

30  
31 Loreen Gilmour PhD, ERAS Alberta, Alberta Health Services, Alberta, Canada  
32

33  
34 Gregg Nelson MD PhD FRCSC, Departments of Oncology and Obstetrics & Gynecology, Cumming  
35  
36 School of Medicine, University of Calgary, Calgary, Alberta, Canada  
37

38  
39 Tracy Wasylak BN, MSc, CHE, Strategic Clinical Networks™, Alberta Health Services, Alberta, Canada  
40

41  
42 Susan Nguyen, PaCER Innovates, University of Calgary, Calgary, Alberta, Canada  
43

44  
45 Edamil Araujo MSc, PaCER Innovates, University of Calgary, Calgary, Alberta, Canada  
46

47  
48 Sandra Zelinsky, PaCER Innovates, University of Calgary, Calgary, Alberta, Canada  
49

50  
51 Leah Gramlich MD, Department of Medicine, University of Alberta, Edmonton, Alberta, Canada  
52

53  
54 **Corresponding Author:**

55  
56 Chelsia Gillis RD MSc

57  
58 University of Calgary  
59  
60

1  
2  
3 TRW Building

4  
5 3rd Floor

6  
7 3280 Hospital Drive NW

8  
9  
10 Calgary, Alberta CANADA T2N 4Z6

11  
12 chelsia.gillis@ucalgary.ca

### 13 14 15 **Structured Abstract**

16  
17  
18 **Objectives:** Explore the experience of patients undergoing colorectal surgery within an Enhanced  
19 Recovery After Surgery(ERAS) program. Use this experiential data to inform the development of a  
20 framework to support ongoing, meaningful patient engagement in ERAS.  
21  
22

23  
24  
25 **Design:** Qualitative patient-led study using focus groups and narrative interviews. Data were analyzed  
26 iteratively using a Participatory Grounded Theory approach.  
27  
28

29  
30 **Setting:** Five tertiary care centers in Alberta, Canada following the ERAS program.

31  
32 **Participants:** Twenty-seven patients who had undergone colorectal surgery in the last 12 months were  
33 recruited through purposive sampling. Seven patients participated in a co-design focus group to set and  
34 prioritize the research direction. Narrative interviews were conducted with 20 patients.  
35  
36

37  
38 **Results:** Patients perceived that an ERAS program should not be limited to the perioperative period, but  
39 should encompass the journey from diagnosis to recovery. Practical recommendations to improve the  
40 patient experience across the surgical continuum, and enhance patient engagement within ERAS  
41 included:(1) Fully explain every protocol, and the purpose of the protocol, both before surgery and while  
42 in-hospital, so that patients can become knowledgeable partners in their recovery;(2) Extend ERAS  
43 guidelines to the pre-surgery phase, so that patients can be ready emotionally, psychologically and  
44 physically for surgery;(3) Extend ERAS guidelines to the recovery period at home to avoid stressful  
45 situations for patients and families;(4) Consider activating a program where experienced patients can  
46 provide peer support;(5) One-size does not fit all; personalized adaptations within the standardized  
47 pathway are required.  
48  
49  
50  
51  
52  
53  
54  
55  
56  
57  
58  
59  
60

1  
2  
3 Drawing upon this data, and through consultation with ERAS Alberta stakeholders, the ERAS team  
4 developed a matrix to guide sustained patient involvement and action throughout the surgical care  
5 continuum at three levels: individual, unit, and ERAS system.  
6  
7  
8

9  
10 **Conclusion:** This patient-led study generated new insights into the needs of ERAS patients and informed  
11 the development of a framework to improve patient experiences and outcomes.  
12

#### 13 **Article Summary: Strengths and limitations of this study**

- 14
- 15
- 16
- 17 • This is the first patient-led ERAS study, whereby patients were trained to conduct experiential  
18 patient research, to characterize the needs and expectations of patients following ERAS care.  
19
- 20 • Our qualitative findings emerged from participatory grounded theories: a methodology that  
21 involves patients as partners throughout the research process.  
22
- 23 • Patient-led research provides an important link between experiential patient research and  
24 implementation, adding to the foundation of implementation science.  
25
- 26 • We cannot assume that our findings regarding patients' experience with ERAS for colorectal  
27 surgery are representative of all patient experiences with ERAS.  
28  
29  
30  
31  
32  
33

34 **Authorship statement:** All authors meet the ICMJE criteria for authorship. NM, MG, SZ, LG, GN, TW,  
35 LG were involved in the conception and design of the PaCER work. GM and KM conceived, designed,  
36 and wrote the implementation component. MG, NM, SZ, SN, EA were involved with the acquisition,  
37 analysis, and interpretation of data. CG was involved with interpretation of the data and drafted the  
38 manuscript. All authors significantly contributed to the revision of the manuscript and provided final  
39 approval of the manuscript. All authors have agreed to be accountable for all aspects of the work.  
40  
41  
42  
43  
44  
45  
46

47 **Funding statement:** This work was supported by Canadian Institutes of Health Research - Strategy for  
48 Patient-Oriented Research (SPOR) - Patient Engagement - Collaboration Grants (grant number: 258077)  
49  
50

51 **Competing interests statement:** The authors have no competing interest to disclose.  
52  
53

54 **Data sharing statement:** The authors do not have unpublished data to share.  
55  
56  
57  
58  
59  
60

## Introduction

The Enhanced Recovery After Surgery (ERAS) program applies evidence-based perioperative interventions that, collectively, reduce morbidity and length of hospital stay.<sup>1-3</sup> Given its clinical success, a number of qualitative studies have been conducted to provide insight into patient experiences and satisfaction with the program. Overall, a high level of contentment with ERAS has been reported with the exception of a few services: preoperative preparation and postoperative support have been consistently documented as not meeting patient needs.<sup>4-7</sup> Despite these qualitative findings, there has been little change in the pre- and postoperative supportive guidelines.

Patient-centeredness is fundamental to the mission of healthcare, yet traditionally patients have not been involved as partners in shaping their health services. This issue is multifaceted and has real clinical consequences. For instance, central to ERAS' effectiveness, is the adherence to 22 elements,<sup>8</sup> some of which, such as pre-admission oral carbohydrate loading, are completely reliant on patient adherence. A clearer understanding of the patient's perceived and potential role, as well as how to best support patients throughout their surgical journey is an essential first step in mitigating potential patient barriers to successful ERAS implementation. Furthermore, understanding this experience from the patient perspective can highlight issues that health professionals & health systems may not anticipate.

The primary research objective was to explore the experience of patients undergoing colorectal surgery within an ERAS program, in order to develop a better understanding of how the ERAS system currently supports patient needs. Although a number of qualitative studies have addressed patients' experience with ERAS, no studies have been driven by patients, working with patients. Trained patient researchers with relevant surgery experience can effectively engage patient-participants throughout the research process to ensure the findings are relevant and important to the users of ERAS.<sup>9</sup>

In an effort to move beyond the dissemination of our findings, the ERAS team employed patient engagement consultants to develop a patient engagement framework for ERAS; therefore, the research conducted also includes an implementation component, which will be presented as part of the study



1  
2  
3 findings. Building capacity for sustained patient engagement within the existing ERAS system has the  
4 potential to impact medical decision-making, care process across the continuum, the quality of research  
5 conducted, uptake of research findings, adherence to care guidelines, and, ultimately, health  
6 outcomes.<sup>10,11</sup>  
7  
8

## 9 10 11 **Methods**

12  
13 Patient and Community Engagement Researchers (PaCERs) are patients who have been trained to  
14 conduct experiential qualitative research using Participatory Grounded Theory methodology for the  
15 purpose of transforming the role of the patient's health, healthcare, and health research.<sup>9,12</sup> Participatory  
16 Grounded Theory merges participatory research methods with the principles of grounded theory.<sup>13,14</sup> The  
17 PaCER methodology of *Set, Collect, Reflect* (Figure 1) engages patient-participants as partners  
18 throughout every step of the research process for the purpose of developing testable theories based on  
19 real world patient experience. Employing patient-researchers, who have undergone a similar experience  
20 to that of the patient-participants, facilitates an environment whereby participants can be comfortable  
21 uncovering the depths of their own experience, and may reduce the perceived power imbalance between  
22 researcher and interviewee.<sup>15,16</sup>  
23  
24  
25  
26  
27  
28  
29  
30  
31  
32  
33  
34

## 35 *Patients*

36  
37  
38 A total of 27 patients were enrolled between July 2015 and Sept 2016 through purposive sampling from  
39 five hospitals in Alberta, Canada employing the ERAS Alberta Implementation Program for colorectal  
40 surgery.<sup>2</sup> Ethics approval for the PaCER study was obtained by the Conjoint Research Ethics Board.  
41 Patients met inclusion criteria if they had been identified by their surgeons as participants in the ERAS  
42 program, were >18 years of age, and spoke English well enough to participate in a focus group or  
43 interview. All patients were provided with a Consent to Contact Form at their surgeon's office and/or  
44 during their primary hospital admission for surgery. Interested, consented patients were then contacted by  
45 a PaCER researcher who provided further study details. Patients did not have a prior relationship with the  
46 PaCER research team, and were made aware of the study objective. Recruitment was conducted by  
47 telephone and separated into two phases and to generate a sample representative of varied  
48  
49  
50  
51  
52  
53  
54  
55  
56  
57  
58  
59  
60

1  
2  
3 postoperative lengths and experiences. Phase one (n=15) involved recruitment for one focus group (n=7)  
4 and 8 narrative interviews with patients who had undergone surgery in the previous 12 months. To reach  
5 saturation and test emerging themes, we carried out a second phase of recruitment, which consisted of  
6  
7 12 in-hospital interviews and 7 follow-up interviews at three-weeks post-surgery. The sample included 10  
8  
9 females and 17 males, aged 29 to 89 years. None of the patients withdrew from the study. All study  
10  
11 participants signed an informed consent form prior to being interviewed or participating in a focus group.  
12  
13

#### 14 15 16 *Set/Co-Design Focus Group*

17  
18  
19 The *Set* stage is the initial co-design phase of the PaCER methodology.<sup>9</sup> A 5-hour focus group was held  
20  
21 in a private space within the university, with 7 patients representing 4 hospitals, for the purpose of guiding  
22  
23 data collection (i.e., language and scope of responses). The initial question posed to the group was:  
24  
25 *Please tell us about your post- surgery experience while you were in hospital.* This question opened the  
26  
27 door for participants to describe their knowledge of ERAS and recount their experiences coping with the  
28  
29 ERAS protocols. Discussion among the participants was encouraged with a series of prompts used by  
30  
31 trained PaCER researchers to deepen and elaborate the information provided. The focus group was  
32  
33 facilitated audio recorded and transcribed by the PaCER researchers.  
34  
35  
36

37  
38 The topics that emerged included: 1) *How nurses introduced and encouraged the ERAS protocols during*  
39  
40 *the preoperative clinic education appointment and in-hospital; 2) Pre-surgery stress; 3) Surprise at the*  
41  
42 *high level of gas pain; 4) Stress around biopsy results; 5) Nutrition; 6) Level of knowledge of ERAS; 7)*  
43  
44 *Journals* (an ERAS Alberta initiative to get patients to track compliance to ERAS elements not traditionally  
45  
46 included in the ERAS program or within patient charts). These initial ideas were shared with the ERAS  
47  
48 teams and researchers and were used to formulate subsequent guiding questions for the data collection  
49  
50 phase.  
51

#### 52 53 *Data collection / Analysis cycles*

54  
55  
56 Data collection and analysis was conducted according to grounded theory practice, with small groups of  
57  
58 interviews analyzed by three PaCER researchers using open coding methods, in an iterative process to  
59  
60

1  
2  
3 ensure interrogation of the data and emerging themes, as well as to guide the direction of recruitment and  
4 data collection strategies.<sup>9</sup> All PaCER researchers kept a research diary to memo and be reflexive.  
5  
6  
7

8  
9 Narrative interviews encouraged participants to “tell their story”, using prompts sparingly to elicit greater  
10 depth. Once the patient had told the story of their experience, open-ended questions were posed to test  
11 emerging themes. Phase one included 8 individual narrative interviews, in which 5 hospitals were  
12 represented. Phase two included participants from one hospital, in which 12 individual narrative  
13 interviews were conducted on the second postoperative day with 7 follow-up interviews 3-weeks post-  
14 discharge. The interviews conducted at bedside were uninterrupted by non-participants. Data code  
15 saturation was reached after the tenth narrative interview. All interviews were conducted, audio recorded  
16 and transcribed by the PaCER researchers. After each interview and focus group the participants  
17 reflected on what they had learned about their experience and what they thought should be explored in  
18 future interviews. Data collection / analysis cycles with the PaCER team continued until a core construct  
19 emerged that organized the working theory and emerging themes.<sup>9</sup>  
20  
21  
22  
23  
24  
25  
26  
27  
28  
29  
30

### 31 *Reflect*

32  
33 Participants from the interview and co-design phases were invited to *Reflect* on the study findings.<sup>9</sup>  
34 Interested participants (n=7) engaged in a telephone interview to discuss the findings and offer feedback.  
35 This stage tests the truth value and consistency of the findings with the users of the ERAS program.  
36  
37  
38 The net result is a research method that involved patients as partners throughout the research process.  
39  
40  
41 The Inclusion of patients in analysis and interpretation of findings ensures pragmatic and relevant  
42 recommendations. In fact, Participatory Grounded Theory has been used successfully to develop  
43 practice-changing theories to treat osteoarthritis and improve care in the intensive care unit.<sup>12,17</sup>  
44  
45  
46  
47  
48

### 49 *Reliability*

50  
51 Grounded theory methods ensure careful and ongoing interrogation of findings as data is collected and  
52 analyzed. In addition, methods (two distinct methods, three phases of research) and data sources (five  
53 hospitals and in-patient, follow-up interviews) provided a foundation for triangulation of data to enhance  
54  
55  
56  
57  
58  
59  
60

the rigor of the study and breadth of study findings.<sup>18</sup> Research colleagues in ERAS, academic PaCER supervisors and peers were also asked to review and discuss memos, emerging data, coding, and themes to confirm the findings for the purpose of achieving investigator triangulation. Differences among researchers were discussed before coming to a consensus.

**Results**

The core concept that emerged from the data was clear: the majority of patients, once they understood the ERAS program, wanted to be included to know why the protocols were important and, most of all, wanted to take on an active, collaborative role throughout their surgical journey. By beginning this partnership early, patients feel better prepared to leave hospital and continue their recovery at home. Thus, the overarching concept is “invite me into ERAS, from diagnosis to recovery, so that I can take responsibility for my own health”. Patients perceived that, to be a program focused on enhanced recovery, ERAS should not be limited to the perioperative period, but should encompass the journey from diagnosis to recovery at home (Figure 2). The results section is therefore divided into four main categories, each with subcategories: (1) Patient preoperative experiences with seven subcategories; (2) In-hospital experiences with providers with five subcategories; (3) Non-provider related in-hospital experiences with 2 subcategories; (4) Post hospital discharge experiences with four subcategories (Table 1).

**Table 1: A patient-driven grounded theory of the ERAS journey**

| Patient experiences with an Enhanced Recovery After Surgery (ERAS) program                                                       |                                                                                                                                                                                                                                                                                                                                                 |
|----------------------------------------------------------------------------------------------------------------------------------|-------------------------------------------------------------------------------------------------------------------------------------------------------------------------------------------------------------------------------------------------------------------------------------------------------------------------------------------------|
| Overarching Concept: <i>invite me into ERAS, from diagnosis to recovery, so that I can take responsibility for my own health</i> |                                                                                                                                                                                                                                                                                                                                                 |
| Category                                                                                                                         | Sub-category                                                                                                                                                                                                                                                                                                                                    |
| Waiting & preparing for surgery: Preoperative experiences                                                                        | <ul style="list-style-type: none"> <li>• Knowledge of ERAS</li> <li>• Preoperative information from surgeons &amp; nurses</li> <li>• <u>Stress:</u> <ul style="list-style-type: none"> <li>• Fears about surgery</li> <li>• Worry about finances, family, work</li> <li>• Bowel preparation and travel related stressors</li> </ul> </li> </ul> |

|                                                                         |                                                                                                                                                                                                             |
|-------------------------------------------------------------------------|-------------------------------------------------------------------------------------------------------------------------------------------------------------------------------------------------------------|
|                                                                         | <ul style="list-style-type: none"> <li>• Lack of information</li> </ul>                                                                                                                                     |
| Surgery & stay in-hospital: In-hospital experiences with providers      | <ul style="list-style-type: none"> <li>• Pain control</li> <li>• Journal</li> <li>• Following ERAS protocol</li> <li>• Medical care &amp; postoperative health</li> <li>• Rapport with providers</li> </ul> |
| Surgery & stay in hospital: Non-provider related in-hospital experience | <ul style="list-style-type: none"> <li>• Noise level</li> <li>• Nutrition</li> </ul>                                                                                                                        |
| Managing at home: Discharge and post discharge experiences              | <ul style="list-style-type: none"> <li>• Discharge information</li> <li>• Biopsy test results</li> <li>• Medical concerns &amp; home help</li> <li>• Need for a designated contact</li> </ul>               |

## 1. Waiting & preparing for surgery: Preoperative experiences

### **Knowledge of ERAS**

More than half of patients interviewed didn't know what ERAS was, or that they were involved in an ERAS program. Many of the patients who were aware of ERAS, however, chose to become more informed prior to surgery and two participants chose to "get themselves fit" for surgery.

### **Preoperative information from surgeons & nurses**

Patients explained that nurses provided the majority of the ERAS information. Surgeons focused on the understanding of the surgical procedures and knowing what to expect when waking up post-surgery.

Many patients perceived that the preoperative information provided came too late.

*"Of course, they did inform us about being fit but it was only 4 days before [surgery]."*

*"If somebody comes up to you and says 'well, you should've went for walk for the first 3 weeks before your surgery but you can't tell them that the day of the surgery you have to tell them that*

1  
2  
3 way beforehand. Any information you're going to get that's going to improve or speed up your  
4 recovery 99% of the people in the world are going to do it unless you physically can't"  
5  
6  
7

## 8 **Stress**

9  
10 Many patients talked about various stressors they encountered while waiting for surgery, such as: 1)  
11 Fears about the surgery; 2) Worry about finances, family, work; 3) Bowel preparation for those who had  
12 mobility issues or travel before surgery; and 4) Lack of information.  
13  
14

15  
16 In fact, almost all patients expressed some level of fear and believed that help resolving stressors,  
17 including guidance in the access of appropriate services, would have helped them during the waiting  
18 period for surgery, and allowed them to go into surgery much calmer and less tired. Patients believed that  
19 better pre-surgery physical and mental health equated to a faster recovery. Lack of knowledge of  
20 available resources meant few patients even reached out to community services on their own.  
21  
22  
23  
24  
25  
26  
27

28 *"There is a lot of stress and fear and those things can stop you getting well and healing fast.*  
29 *Should some thought be given to helping patients with stress and fears. Maybe there should be*  
30 *someone who can have a conversation with you so you can talk about all these things and make*  
31 *sure that you are in the best mind to be healed"*  
32  
33  
34  
35  
36

37 Perceived lack of information regarding the results of preoperative assessments, what the surgeon had  
38 planned to do, and how long it would take to recover from the surgery were all pre-surgery stressors. Of  
39 note, those who had attended a class or had been able to discuss their surgery with their surgeon or  
40 nurses felt more confident going into their surgery in knowing what to expect.  
41  
42  
43  
44  
45

46 *"... Where the main thrust of learning about ERAS came was meeting the nurses [at the preoperative*  
47 *clinic] who were just godsend. I really look back fondly on that day."*  
48  
49  
50  
51

## 52 **2. Surgery & stay in-hospital: In-hospital experiences with providers**

### 53 **Pain control**

54  
55  
56  
57  
58  
59  
60

1  
2  
3 Most participants experienced some level of pain, especially during the first two postoperative days, but  
4  
5 believed that providers controlled their pain level appropriately. A few patients had concerns about  
6  
7 becoming addicted to the pain medication.  
8  
9

10 The pain that surprised many participants was the high level of intraperitoneal gas pain they experienced  
11  
12 as a result of the inflation of the abdomen for laparoscopic surgery. These patients believed they should  
13  
14 have been alerted to this possibility pre-surgery.  
15  
16

17 Patients treated with patient-controlled analgesia appeared to feel good about having some sense of  
18  
19 control over their pain medication and were less anxious than patients who were relying on providers to  
20  
21 administer the drugs. In fact, a few patients feared falling asleep in case their nurse forgot to bring the  
22  
23 medication at the appropriate time.  
24  
25

### 26 **Journal**

27  
28 In a novel approach with ERAS implementation and building upon the McGill experience, Alberta Health  
29  
30 Services adopted the use of journals for patients to track mobility, nutrition, breathing exercises, gum  
31  
32 chewing and urinary output. Many patients who were given a journal to complete daily did not see the  
33  
34 point of the journal and explained that they were too tired or too busy fulfilling the ERAS expectations to  
35  
36 fill out all their journal activities. A few patients said it was helpful, but most felt it was not useful for them,  
37  
38 and believed it was useful for the providers rather than patients.  
39  
40

41  
42 *"The nurses were motivating but I didn't want to write in the book, I got my mom or girlfriend to do*  
43  
44 *it. Writing in the book was not my priority, walking around helps the bowels more."*  
45  
46

### 47 **Following ERAS protocols**

48  
49 Patients who had a better understanding of the ERAS program were more likely to follow the expected  
50  
51 protocols. It would appear that fully understanding the rationale for the protocol led to greater adherence.  
52  
53

54  
55 *"I did it, but didn't know why. I think people would be more diligent if they knew why the walking*  
56  
57 *was so important, why the protein was so important..."*  
58  
59  
60

1  
2  
3  
4 Some patients perceived that they were too unwell to follow the program, and explained that their  
5  
6 providers were sticking to the protocol without taking their personal physical health into account. The  
7  
8 inability of providers' to be flexible, or modify the ERAS protocols appeared to engender some anxiety  
9  
10 around the protocols.

11  
12  
13 *"The nurses and doctors were pushing me to eat. I did not understand how important it was to eat*  
14  
15 *as soon as possible. I thought the body needs healing..."*  
16

17  
18 Patients liked the concept of being part of team that was invested in their timely recovery, rather than  
19  
20 simply being told what to do. Being treated as an individual who was doing his/her best, and perceiving  
21  
22 that providers were not simply following rules, allowed patients to invest more effort into following the  
23  
24 protocols.

25  
26  
27 *"...People want to help, and they want to have a sense of belonging, especially in the hospital*  
28  
29 *where you're recovering and going through a tumultuous amount of thoughts... hey we're on this*  
30  
31 *ERAS program, this is what we found helps other patients... and it would help if you did this...that*  
32  
33 *partnership, that team."*  
34

### 35 36 **Medical care & postoperative health**

37  
38 Although most patients reported an uneventful recovery in hospital, several patients discussed concerns  
39  
40 they had with their postoperative care, which caused undue anxiety and impeded recovery. These  
41  
42 concerns included lack of information around biopsy results, inconsistency in information sharing between  
43  
44 providers at shift changes, perceived mismanagement of nasogastric tubes, and an inability to have a  
45  
46 conversation with their surgeon.  
47

### 48 49 **Rapport with providers**

50  
51 Patients reported that good rapport or relationship with the nursing staff was provider-dependent. Some  
52  
53 nurses were really good at informing and supporting patients as individuals, others were less attentive or  
54  
55  
56  
57  
58  
59  
60



1  
2  
3 interested. Some nurses were perceived as being focused on following the ERAS protocols independent  
4 of the patient's condition.  
5  
6  
7

### 8 **3. Surgery & stay in hospital: Non-provider related in-hospital experience**

#### 9 **Noise level**

10  
11  
12 Most of the participants complained that the noise level in hospital made it difficult for them to sleep, even  
13 at night, and questioned whether this negatively impacted their recovery. Patients also wondered about  
14 the necessity of having blood samples taken in the middle of the night or very early in the morning.  
15  
16  
17  
18

#### 19 **Nutrition**

20  
21  
22 Most patients stated that they would have preferred some guidance about appropriate food for relatives to  
23 bring from home. Patients who had been warned about the postoperative low fibre diet of Alberta Health  
24 Services appeared more forgiving. A few patients noted that there were no food options available  
25 between scheduled mealtimes when they felt prepared to eat.  
26  
27  
28  
29  
30  
31

### 32 **4. Managing at home: Discharge and post discharge experiences**

#### 33 **Discharge information**

34  
35  
36 Although the majority of patients believed they had adequate discharge information, some participants  
37 raised major concerns that had not been fully explained, including bleeding from the rectum, variation in  
38 bowel movements, and diet. Mixed messages and differing provider advice also caused confusion for  
39 some patients. All of these issues caused varying levels of anxiety for patients' management at home.  
40  
41  
42  
43  
44

45  
46 *"The surgery itself was actually a huge success but they didn't warn me about the number of*  
47 *accidents that I might have or things like that. From what I hear it is fairly common with a lot of*  
48 *people, and that wasn't discussed at all...."*  
49  
50  
51  
52  
53  
54  
55  
56  
57  
58  
59  
60

1  
2  
3 *“Don’t feel that they gave me much information about what to expect [post op]. What is normal or*  
4 *not normal...I experienced a little bit of bleeding. I was kind of concerned about that. It took the*  
5 *nurse [surgeon’s office] quite a while to get back to me on that too”*  
6  
7  
8

9  
10 *“The take home sheet that I had, it did say eat more small meals and make sure you drink a lot of*  
11 *water. Things like that. Helpful hints. I wanted more detail than that.”*  
12  
13

### 14 15 ***Biopsy and test results*** 16

17  
18 Most patients did not receive their biopsy, or other test, results until their surgical consult six-weeks after  
19 their operation. Many patients were unaware of the necessary time required to review and report these  
20 results, and this caused undue anxiety.  
21  
22

### 23 24 25 ***Medical concerns and home help*** 26

27  
28 Several participants had medical concerns, such as problems with their incision, which caused anxiety,  
29 particularly because there was uncertainty regarding the best service to contact. The few participants who  
30 had needed and received help at home, believed that these providers had not received enough  
31 information from the hospital to be able to support them adequately.  
32  
33  
34

### 35 36 37 ***Need for a designated contact when patients go home*** 38

39  
40 Many patients believed it to be necessary to provide an alternate contact besides the surgeons,  
41 physicians, or Health Link (24/7 telephone nurse advice and general health information for Albertans) to  
42 have their concerns addressed. Many hesitated to call their doctors’ offices, especially about diet and  
43 bowel movements, and those who called because of concerns regarding their incision and bleeding  
44 usually waited up to two days to have their questions answered. There was consensus that either a  
45 professional or experienced patient volunteer, who could provide answers or knew where to direct their  
46 concerns, would be an ideal resource for patients managing their recovery at home.  
47  
48  
49  
50  
51  
52  
53  
54  
55  
56  
57  
58  
59  
60

1  
2  
3 "I do think that there should be a follow-up phone call about a week from that enhanced program  
4 itself, not just your doctor...how are things going, do you have any concerns, do you have any  
5 questions..."  
6  
7  
8  
9

### 10 **Implementation: A patient engagement framework**

11  
12  
13 Recognizing that it is important to learn from patients' experience with ERAS, and use this learning to  
14 move research forward into practice, the ERAS team consulted patient engagement experts to develop a  
15 patient engagement framework. The approach taken to develop this framework was as follows:  
16  
17

- 18 • A scan of the academic literature regarding patient experiences with ERAS or other similar surgical  
19 programs. A total of 11 articles were determined to be relevant, and reviewed (a comprehensive  
20 literature search and review was beyond the scope of this project).<sup>4,5,19-27</sup>  
21  
22
- 23 • A scan of the grey literature regarding strategies for engaging surgery patients in quality  
24 improvement and for other patient engagement frameworks.<sup>28-31</sup>  
25  
26
- 27 • In-depth review of the present PaCER findings.  
28  
29
- 30 • Semi-structured, key informant interviews (n=9) were conducted with a purposive sample of four  
31 ERAS nurse coordinators, a PaCER researcher, a patient advisor from the provincial surgery  
32 governing body, a patient experience consultant for Alberta Health Services, and a University of  
33 Calgary-based expert in Patient Reported Experience/Outcome Measures (PROMS/PREMS).  
34  
35  
36  
37  
38  
39

40 A continuum-based framework was developed based on the International Association for Public  
41 Participation (IAP2) spectrum of participation<sup>32</sup> and key guiding principles that emerged from the  
42 framework consultation (Table 2). Patients select their desired level of ERAS involvement along a  
43 continuum of equally valued engagement options from *we inform patients, patients inform us, patients*  
44 *'co-lead' and 'co-design' with us*, to *patients lead* at the level of being *engaged in their own individual*  
45 *care, the unit care, and the ERAS system* (Table 3). The highest level of engagement involves *patients as*  
46 *partners and researchers of ERAS*. At this level, patients are meaningfully included as partners in the  
47 planning, conduct, and dissemination of research. It is generally acknowledged that no part along this  
48 continuum is inherently 'better' than another part.<sup>30,31</sup> Rather what's important is that there is a good  
49  
50  
51  
52  
53  
54  
55  
56  
57  
58  
59  
60

1  
2  
3 match between how patients would like to be involved and the opportunities for involvement. Health  
4 professionals, organizations, and patients can use this matrix to identify the extent of patient involvement,  
5 and what can be supported or sustained.  
6  
7  
8

9  
10 There is no value in collecting patient experience and outcome data unless it is going to be used to  
11 influence needed changes across the surgical continuum.<sup>11</sup> At each level, there must be a mechanism to  
12 evaluate outcomes, and a mechanism to disseminate the findings and outcomes to the patients involved,  
13 local ERAS team, hospital and system leaders. Table 4 provides examples of a mechanism to evaluate  
14 and disseminate outcomes at the patient level.  
15  
16  
17  
18  
19  
20  
21  
22

23 **Table 2: Key principles to guide patient engagement in ERAS**

| Guiding principle                                                                                                                                                                                               | Description                                                                                                                                                                                                                                                                                                                |
|-----------------------------------------------------------------------------------------------------------------------------------------------------------------------------------------------------------------|----------------------------------------------------------------------------------------------------------------------------------------------------------------------------------------------------------------------------------------------------------------------------------------------------------------------------|
| 24<br>25<br>26 <b>1. “One size will not fit all”</b>                                                                                                                                                            | No single step-by-step process or ‘model’ for patient engagement can be developed. There is a need to recognize the different cultures and contexts within which ERAS is being implemented; the reality that patients will have different preferences regarding how they want, or are able, to be involved at every level. |
| 27<br>28<br>29<br>30<br>31<br>32 <b>2. Wherever possible, build on existing mechanisms for capturing, analyzing and disseminating patient/family feedback</b>                                                   | This approach will avoid unnecessary duplication of effort and will be more cost effective. It is recognized, however, that new data collection, analysis, and dissemination approaches may be required.                                                                                                                   |
| 33<br>34<br>35<br>36<br>37<br>38 <b>3. Experiences from a broad cross-section of patients should be sought</b>                                                                                                  | Patients with either very poor or very good experiences, and those with greater resources, are more likely to provide input. In order to capture a broad range of experiences, it is important to identify and address barriers to participation wherever possible.                                                        |
| 39<br>40<br>41<br>42<br>43<br>44<br>45<br>46<br>47<br>48<br>49 <b>4. Not all illnesses or surgeries are the same, so it may be important to identify subgroups of patients that may have some unique issues</b> | Although there will be some commonalities with respect to patients’ experiences with colorectal surgery and ERAS, there may also be differences. For example, patients with inflammatory bowel disease may have some unique issues and needs compared to those with bowel cancer.                                          |
| 50<br>51<br>52<br>53<br>54 <b>5. Priority should be given to what patients want to tell us, not just what the system wants to hear</b>                                                                          | While ERAS personnel have many important questions about patient experiences, it is crucial that patients also have open-ended opportunities to talk about issues of importance to them, issues that may not be anticipated by health professionals.                                                                       |
| 55<br>56<br>57<br>58 <b>6. Nursing units and the ERAS program need to value patient feedback and</b>                                                                                                            | Meaningful patient engagement requires that health care professionals be interested in hearing patient feedback and using it to inform changes in practice and policy. Individual                                                                                                                                          |

|                                                                             |                                                                                                                                                                                                                                                    |
|-----------------------------------------------------------------------------|----------------------------------------------------------------------------------------------------------------------------------------------------------------------------------------------------------------------------------------------------|
| <b>expertise and be invested in ongoing learning and improvement</b>        | health professionals need to be supported by units and facilities that are invested in and provide supports for ongoing learning and improvement.                                                                                                  |
| <b>7. Patients need to know how their input is being used</b>               | Leading in, there is a need to let patients know how their input will be used, and then afterwards it is important to circle back and let patients know the impact of their input.                                                                 |
| <b>8. Patient engagement needs to be resourced if it is to be done well</b> | Patient insights can be a core contributor to changes in policy and practice that will result in more positive patient experiences and better outcomes. Patient engagement must be well-resourced in order to optimize its value and contribution. |

Table 3: An 'engaging patients in ERAS' matrix

|                                                                                 | <b>We inform patients</b>                                                                                                                                                                                                                                                                              | <b>Patients inform us</b>                                                                                                                                                                                                                                                 | <b>Patients 'co-lead' and 'co-design' with us</b>                                                                                                                                          | <b>Patients Lead</b>                                                                                                                                             |
|---------------------------------------------------------------------------------|--------------------------------------------------------------------------------------------------------------------------------------------------------------------------------------------------------------------------------------------------------------------------------------------------------|---------------------------------------------------------------------------------------------------------------------------------------------------------------------------------------------------------------------------------------------------------------------------|--------------------------------------------------------------------------------------------------------------------------------------------------------------------------------------------|------------------------------------------------------------------------------------------------------------------------------------------------------------------|
| <b>Individual care level</b><br><i>[Patients are engaged in their own care]</i> | -Patients are provided with clear information about ERAS throughout the surgical trajectory, in ways that work for them<br>- Preoperative education information is shared with patients prior to their clinic appointment so that they can ask informed questions<br>-Information needs to be repeated | -Patients tell us what's important to them across the surgical trajectory & this information guides their care                                                                                                                                                            | -Patients are involved in shared decision-making<br>-Patients are involved in the development of mechanisms, such as apps or log books, to track recovery                                  | -Patients make their own decisions based on information & options provided<br>- Patients have the opportunity to talk with peers (e.g., an online support forum) |
| <b>Unit level</b><br><i>[Patients are engaged at the Unit level]</i>            | -Nursing unit supports staff in patient education activities.                                                                                                                                                                                                                                          | -Patients provide feedback via short unit-specific surveys, and informal interviews; this information is shared with nursing staff on a consistent and timely basis.<br>-Patients are invited to share their experience at staff meetings.<br>-Unit has a patient council | -Patients are equal members of unit quality-improvement councils, working collaboratively with their health professional colleagues<br>-Patients co-lead unit quality improvement projects | -Peer supporters work on units to support patient recovery<br>- Peer supporters obtain input from patients on their experience & outcomes                        |
| <b>ERAS initiative level</b><br><i>[Patients are engaged at</i>                 | -The development and evaluation of ERAS preoperative education modules are informed by what                                                                                                                                                                                                            | -ERAS database is modified to collect data on PREM/PROMs<br>-Patient research                                                                                                                                                                                             | -Patients are members of the local and international ERAS project team                                                                                                                     | -Patients are engaged as researchers<br>-Peer support is built into the                                                                                          |

|                                                                                                                |                        |                                                                                                     |                                                                                                                   |                                          |
|----------------------------------------------------------------------------------------------------------------|------------------------|-----------------------------------------------------------------------------------------------------|-------------------------------------------------------------------------------------------------------------------|------------------------------------------|
| <i>the ERAS level]</i>                                                                                         | patients need and want | participants are meaningfully involved throughout research processes<br>-ERAS has a patient council | -Patients participate in the development of PROMs/PREMs<br>-Patients are members of ERAS education working groups | ERAS initiative as an integral component |
| <b>The surgical continuum across which patients are engaged extends from diagnosis to recovery</b>             |                        |                                                                                                     |                                                                                                                   |                                          |
| <b>Patients choose how they want to engage - and there is recognition that this may change over time</b>       |                        |                                                                                                     |                                                                                                                   |                                          |
| <b>The knowledge and experiential expertise that patients bring, at each of these levels, is highly valued</b> |                        |                                                                                                     |                                                                                                                   |                                          |

PREM refers to patient-reported experience measures; PROM is patient-reported outcome measures. The cells of the matrix have been populated with some examples of how patients might be involved across the engagement continuum and at the different levels. These are not meant to be recommended activities, but are simply illustrative examples of what this kind of engagement could look like. Along the base of the matrix are three foundational elements of patient engagement: 1) The knowledge and experiential expertise that patients bring, at each of these levels, is highly valued; 2) Patients choose how they want to engage and there is recognition that this may change over time; and 3) The surgical trajectory across which patients are engaged extends from diagnosis to recovery at home

**Table 4: A mechanism for the evaluation and dissemination of outcomes at the individual care level**

|                                           | <b>We inform patients</b>                                                                                         | <b>Patients inform us</b>                                                                                                                                                                                                 | <b>Patients ‘co-lead’ and ‘co-design’ with us</b>                                                                                                 | <b>Patients Lead</b>                                                                           |
|-------------------------------------------|-------------------------------------------------------------------------------------------------------------------|---------------------------------------------------------------------------------------------------------------------------------------------------------------------------------------------------------------------------|---------------------------------------------------------------------------------------------------------------------------------------------------|------------------------------------------------------------------------------------------------|
| <b>Evaluation</b><br><i>[Examples]</i>    | -Trivia game online to assess patient understanding of basic ERAS guidelines and principles                       | -A patient satisfaction survey to evaluate education activities<br>-An open-ended section in journal/log book for patients to write about their experience, which can be collected and analyzed using qualitative methods | -Patients use log books, apps, or other mechanisms that work for them to track their own recovery<br>-Patients rate the usefulness of these tools | - Peer supporters obtain input from patients on their experience & outcomes                    |
| <b>Dissemination</b><br><i>[Examples]</i> | -Game results can be tabulated and presented at staff meetings to inform local practice of patient knowledge gaps | - “what’s new” section on the ERAS website to provide feedback to patients and public regarding how patient involvement shapes current practice                                                                           | - Recovery tools are modified based on patient feedback and new tools are launched on the ERAS website with a “how-to” video led by patients      | -Peer supporters disseminate their findings at local staff meetings to inform current practice |

1  
2  
3 The cells of the matrix have been populated with some examples of how evaluation and dissemination of  
4 outcomes can be implemented at the individual care level. These are not meant to be recommended  
5 activities, but are simply illustrative examples of what this could look like.  
6  
7

## 8 9 **Discussion**

10 The message that patients bring to ERAS is: *if you tell us why, help us understand what we need to do,*  
11 *we will be happy to do all we can.* The findings suggest that patients' perception that they play a major  
12 role within a collaborative ERAS team will improve patient experience and facilitate earlier recovery  
13 through a greater understanding and willingness to adhere to the ERAS in-hospital protocols, and through  
14 confidence in continuing their recovery after discharge. This improved confidence invites patients to co-  
15 create with their ERAS team a patient-centered discharge/recovery plan, which should also reduce the  
16 postoperative burden (e.g., readmissions).  
17  
18  
19  
20  
21  
22  
23

24  
25  
26 A number of our patient findings, such as the desire for greater pre- and postoperative information  
27 provision, have been reported previously,<sup>4-6,33</sup> but have shown little to no change in the ERAS processes.  
28 This failure to implement evidence in practice might represent a gap in the Knowledge-to-Action Cycle.<sup>34</sup>  
29 Our patient findings and the patient engagement framework provide ammunition to encourage the  
30 adoption of a strategy designed to improve patient experiences and outcomes, effectively closing this  
31 gap. Patient input is necessary if patient-centered care is to be operationalized<sup>35,36</sup> and the framework  
32 provides suggestions to engage patients in a systematic process whereby patients are partners in ERAS.  
33 Implementation of the framework, thus, not only provides a means of moving research into practice, but  
34 could also improve the patient-orientation of medical decision-making, policy, and future research within  
35 the ERAS system; ultimately, improving the ERAS processes so that the care provided matches patient  
36 values.  
37  
38  
39  
40  
41  
42  
43  
44  
45  
46  
47  
48  
49

50 In addition, our findings highlight the importance of understanding patient experiences of ERAS in order  
51 to improve the experience for future patients. For example, recognition of numerous sources of anxiety as  
52 patients progress along the surgical continuum, can inform development of strategies to address the  
53 emotional, psychological and social stressors that people undergoing serious, often life-changing surgery,  
54  
55  
56  
57  
58  
59  
60

1  
2  
3 may experience. Attending to these aspects of the surgical journey will contribute to better patient  
4 experiences and outcomes.  
5  
6  
7

8  
9 A strength of the present study is that, through all phases of research, patients were engaged as  
10 partners, and the direction of the research was driven by patient-identified priorities. As a result, we have  
11 identified a number of very practical patient concerns that, if addressed, could enhance patient  
12 experiences with ERAS (Table 5). We have also developed a framework to encourage sustained patient  
13 engagement within the ERAS system (Table 2-4). A clear limitation, as with all qualitative research, is that  
14 the generalizability of the findings may be limited to the participants studied. That said, we collected data  
15 from five hospitals in Alberta and attained diversity in age, gender, and community. Also, our findings are  
16 consistent with the findings of other qualitative studies of ERAS patient experiences<sup>4-7,33</sup>.  
17  
18  
19  
20  
21  
22  
23  
24  
25  
26

27 **Table 5: Practical recommendations to enhance the patient-orientation of Enhanced Recovery**  
28 **After Surgery (ERAS)**  
29

- |                                                                                                                                                                                                                                                                                                                                                                                                                                                                                                                                                                                                                                                                                                                                                                                                                                                                                                                                                            |
|------------------------------------------------------------------------------------------------------------------------------------------------------------------------------------------------------------------------------------------------------------------------------------------------------------------------------------------------------------------------------------------------------------------------------------------------------------------------------------------------------------------------------------------------------------------------------------------------------------------------------------------------------------------------------------------------------------------------------------------------------------------------------------------------------------------------------------------------------------------------------------------------------------------------------------------------------------|
| <p>30 1. Every ERAS protocol, and the purpose of the protocol, should be fully explained to patients both<br/>31 before surgery and while in-hospital, so that patients can become knowledgeable partners in their<br/>32 recovery.<br/>33 2. Extend the ERAS program to the pre-surgery phase, so that patients can be ready emotionally,<br/>34 psychologically, and physically for surgery.<br/>35 3. Extend the ERAS program to the recovery period at home to avoid stressful situations for patients<br/>36 and families.<br/>37 4. Consider activating a volunteer programme where experienced patients can be available for<br/>38 conversations with new patients.<br/>39 5. ERAS, and engaging patients in ERAS, is going to look different for different patients and in different<br/>40 contexts (i.e., there is no 'one-size-fits-all' approach). Personalized adaptations within the standardized<br/>41 pathway need to be considered.</p> |
|------------------------------------------------------------------------------------------------------------------------------------------------------------------------------------------------------------------------------------------------------------------------------------------------------------------------------------------------------------------------------------------------------------------------------------------------------------------------------------------------------------------------------------------------------------------------------------------------------------------------------------------------------------------------------------------------------------------------------------------------------------------------------------------------------------------------------------------------------------------------------------------------------------------------------------------------------------|

42  
43 In conclusion, our findings suggest that patients want to be active participants in their own care. This can  
44 be accomplished by extending the ERAS program to the pre- and postoperative periods and informing  
45 patients of the rationale for each of the ERAS elements. Patients unanimously agreed that if they had fully  
46 understood the benefits, they would pursue the protocols much more vigorously. Patients also require  
47 personalized care and appropriate adaptations within the standardized pathway. Furthermore, patient-led  
48 research provides a unique and powerful opportunity to identify issues that health professionals and  
49 policy-makers may not see. This information can be used to inform development of new strategies to  
50 enhance the patient and family experiences of ERAS.  
51  
52  
53  
54  
55  
56  
57  
58  
59  
60



## References

1. Ljungqvist O, Scott M, Fearon KC. Enhanced Recovery After Surgery: A Review. *JAMA Surg* 2017; Jan 11 [Epub ahead of print]
2. Nelson G, Kiyang L, Crumley E, et al. Implementation of Enhanced Recovery After Surgery(ERAS) Across a Provincial Health Care System: The ERAS Alberta Colorectal surgery Experience. *World J Surg* 2016; 40:1092-103
3. Nguyen T, Chuck A, Wasylak T, et al. An economic evaluation of the Enhanced Recovery After Surgery (ERAS) multi-site implementation program for colorectal surgery in Alberta. *Can J Surg* 2016; 59:6716
4. Blazeby JM, Soulsby M, Winstone K, et al. A qualitative evaluation of patients' experiences of an enhanced recovery programme for colorectal cancer. *Colorectal Dis* 2010;12: e236-42
5. Bernard H, Foss M. Patient experiences of enhanced recovery after surgery (ERAS). *Br J Nurs* 2014; 23: 100-6.
6. Asaa A, Hovback M, Bertoro CM. The importance of preoperative information for patient participation in colorectal surgery care. *J Clin Nurs* 2013; 22:1604-12
7. Sibbern T, Bull Sellevold V, Steindal SA, et al. Patients' Experiences of Enhanced Recovery after Surgery: A systematic review of qualitative studies. *J Clin Nurs* 2016; June 27 [Epub ahead of print]
8. Gustafsson U, Hausel J, Thorell A, et al. Adherence to the Enhanced Recovery After Surgery Protocol and Outcomes After Colorectal Cancer Surgery. *Arch Surg* 2011; 146:571-7
9. Marlett N, Emes C. Grey Matters: A Guide for Collaborative Research with Seniors. Calgary, Alberta: University of Calgary Press, 2010.
10. Anderson M, McCleary KK. From passengers to co-pilots: Patient roles expand. *Sci Transal Med* 2015;7:291fs25
11. Domecq JP, Prutsky G, Elraiyah T, et al. Patient engagement in research: a systematic review. *BMC Health Serv Res* 2014; 14:89
12. Miller JL, Teare SR, Marlett N, et al. Support for Living a Meaningful Life with Osteoarthritis: A Patient-to-Patient Research Study. *Patient* 2016; 9:457-64

- 1  
2  
3 13. Simmons OE, Gregory TA. Grounded action: Achieving optimal and sustainable change. *Forum:*  
4  
5 *Qualitative Social Research* 2003;4: 27  
6
- 7 14. Teram E, Schachter CL, Stalker CA. The case for integrating grounded theory and participatory  
8  
9 action research: empowering clients to inform professional practice. *Qual Health Res* 2005;  
10  
11 15:1129-40  
12
- 13 15. Berger, R. Now I see it, now I don't: Researcher's position and reflexivity in qualitative research.  
14  
15 *Qualitative Research* 2015; 15: 219-34  
16
- 17 16. Gillard S, Simons L, Turner K, et al. Patient and public involvement in the co-production of  
18  
19 knowledge: reflection on the analysis of qualitative data in a mental health study. *Qual Health Res*  
20  
21 2012; 22:1126-37  
22
- 23 17. Gill M, Bagshaw SM, McKenzie E, et al. Patient and Family Member-Led Research in the  
24  
25 Intensive Care Unit: A Novel Approach to Patient-Centered Research. *PLoS One*  
26  
27 2016;11:e0160947  
28
- 29 18. Carter N, Bryant-Lukosius D, DiCenso A, et al. The use of triangulation in qualitative research.  
30  
31 *Oncol Nurs Forum* 2014;41:545-7  
32
- 33 19. Archer S, Montague J, Ball A. Exploring the experience of an enhanced recovery programme for  
34  
35 gynaecological cancer patients: A qualitative study. *Periop Med(Lond)* 2014; 3:2  
36
- 37 20. Bryan S, Dukes S. The enhanced recovery programme for stoma patients: An audit. *Br J Nurs*  
38  
39 2010; 19: 831-4  
40
- 41 21. Fecher-Jones I, Taylor C. Lived experience, enhanced recovery and laparoscopic colonic  
42  
43 resection. *Br J Nurs* 2015; 24:223-8  
44
- 45 22. Kahn S, Wilson T, Ahmed J, et al. Quality of life and patient satisfaction with enhanced recovery  
46  
47 protocols. *Colorectal Dis* 2010; 12:1175-82  
48
- 49 23. Norlyk A, Harder I. Recovering at home: Participating in a fast-track colon cancer surgery  
50  
51 programme. *Nurs Inq* 2011; 18:165-75  
52
- 53 24. Rymaruk S, Williams J, Kurrimboccus S. Carers' perceptions of the enhanced recovery  
54  
55 programme in colorectal surgery. *J Perioper Pract* 2013; 23: 246-50  
56  
57  
58  
59  
60

- 1  
2  
3 25. Short V, Atkinson A, Ness A, et al. Patient experiences of perioperative nutrition within an  
4  
5 Enhanced Recovery After Surgery programme for colorectal surgery: A qualitative study.  
6  
7 *Colorectal Dis* 2015; 18:O74-O80  
8
- 9 26. Taylor C, Burch J. Feedback on an enhanced recovery programme for colorectal surgery. *Br J*  
10  
11 *Nurs* 2011; 20:286-90  
12
- 13 27. Vandrevalla, T, Senior V, Spring L, et al. "Am I ready to go home?": A qualitative study of patients'  
14  
15 experience of early discharge following an enhanced recovery programme for liver resection  
16  
17 surgery. *Support Care Cancer* 2016; 243: 3447-54.  
18
- 19 28. Sheddy A. Handbook on Citizen Engagement: Beyond Consultation. Canadian Policy Research  
20  
21 Network. Retrieved October 2016 from: <http://cprn.org/doc.cfm?doc=1857&l=en>  
22
- 23 29. Kovacs Burns K, Bellows M, Eigenseher C et al. Practical' resources to support patient and family  
24  
25 engagement in healthcare decisions: a scoping review. *BMC Health Serv Res* 2014; 14:175  
26
- 27 30. Carman KL, Dardess P, Maurer M, et al. Patient and Family Engagement: A Framework for  
28  
29 Understanding the Elements and Developing Interventions and Policies. *Health Aff(Millwood)*  
30  
31 2013; 32: 223-31  
32
- 33 31. Alberta Innovates: Patient Engagement Resources. Retrieved October 2016 from  
34  
35 <http://www.aihealthsolutions.ca/initiatives-partnerships/spor/patient-engagement-platform/patient->  
36  
37 [engagement-resources/](http://www.aihealthsolutions.ca/initiatives-partnerships/spor/patient-engagement-platform/patient-)  
38
- 39 32. International Association for Public Participation. P2 Practitioner Tools. Retrieved October 2016  
40  
41 from <http://www.iap2.org/?page=A5>  
42
- 43 33. Lithner M, Johansson J, Andersson E, et al. Perceived information after surgery for colorectal  
44  
45 cancer - an explorative study. *Colorectal Dis* 2012; 14:1340-50  
46
- 47 34. Graham ID, Logan J, Harrison MB, et al: Lost in knowledge translation: time for a map? *J Contin*  
48  
49 *Educ Health Prof* 2006; 26:13-24  
50
- 51 35. National Health Service England. Patient and Public Participation Policy. 2015. Retrieved March  
52  
53 2017 from <https://www.england.nhs.uk/participation/resources/docs/>  
54
- 55 36. Mockford C, Staniszewska S, Griffiths F, et al. The impact of patient and public involvement on  
56  
57 UK NHS health care: a systematic review. *Int J Qual Health Care* 2012;24: 28-38  
58  
59  
60

1  
2  
3 **Figure Legends**  
4

5 **Figure 1** - The Patient and Community Engagement Research (PaCER) methodology of *Set, Collect,*  
6  
7 *Reflect* engages patient-participants as partners throughout the research process.  
8

9  
10 **Figure 2 - Patient-defined surgical journey:** Patient-participants perceived that, to be a program  
11  
12 focused on enhanced recovery, the Enhanced Recovery After Surgery program should not be limited to  
13  
14 the perioperative period, but should encompass the journey from diagnosis to patient-defined recovery.  
15

16  
17  
18  
19  
20  
21  
22  
23  
24  
25  
26  
27  
28  
29  
30  
31  
32  
33  
34  
35  
36  
37  
38  
39  
40  
41  
42  
43  
44  
45  
46  
47  
48  
49  
50  
51  
52  
53  
54  
55  
56  
57  
58  
59  
60

For peer review only

1  
2  
3  
4  
5  
6  
7  
8  
9  
10  
11  
12  
13  
14  
15  
16  
17  
18  
19  
20  
21  
22  
23  
24  
25  
26  
27  
28  
29  
30  
31  
32  
33  
34  
35  
36  
37  
38  
39  
40  
41  
42  
43  
44  
45  
46  
47  
48  
49  
50  
51  
52  
53  
54  
55  
56  
57  
58  
59  
60



peer review only

1  
2  
3  
4  
5  
6  
7  
8  
9  
10  
11  
12  
13  
14  
15  
16  
17  
18  
19  
20  
21  
22  
23  
24  
25  
26  
27  
28  
29  
30  
31  
32  
33  
34  
35  
36  
37  
38  
39  
40  
41  
42  
43  
44  
45  
46  
47  
48  
49  
50  
51  
52  
53  
54  
55  
56  
57  
58  
59  
60



For peer review only

## COREQ (COnsolidated criteria for REporting Qualitative research) Checklist

A checklist of items that should be included in reports of qualitative research. You must report the page number in your manuscript where you consider each of the items listed in this checklist. If you have not included this information, either revise your manuscript accordingly before submitting or note N/A.

| Topic                                          | Item No. | Guide Questions/Description                                                                                                                              | Reported on Page No. |
|------------------------------------------------|----------|----------------------------------------------------------------------------------------------------------------------------------------------------------|----------------------|
| <b>Domain 1: Research team and reflexivity</b> |          |                                                                                                                                                          |                      |
| <i>Personal characteristics</i>                |          |                                                                                                                                                          |                      |
| Interviewer/facilitator                        | 1        | Which author/s conducted the interview or focus group?                                                                                                   |                      |
| Credentials                                    | 2        | What were the researcher's credentials? E.g. PhD, MD                                                                                                     |                      |
| Occupation                                     | 3        | What was their occupation at the time of the study?                                                                                                      |                      |
| Gender                                         | 4        | Was the researcher male or female?                                                                                                                       |                      |
| Experience and training                        | 5        | What experience or training did the researcher have?                                                                                                     |                      |
| <i>Relationship with participants</i>          |          |                                                                                                                                                          |                      |
| Relationship established                       | 6        | Was a relationship established prior to study commencement?                                                                                              |                      |
| Participant knowledge of the interviewer       | 7        | What did the participants know about the researcher? e.g. personal goals, reasons for doing the research                                                 |                      |
| Interviewer characteristics                    | 8        | What characteristics were reported about the interviewer/facilitator? e.g. Bias, assumptions, reasons and interests in the research topic                |                      |
| <b>Domain 2: Study design</b>                  |          |                                                                                                                                                          |                      |
| <i>Theoretical framework</i>                   |          |                                                                                                                                                          |                      |
| Methodological orientation and Theory          | 9        | What methodological orientation was stated to underpin the study? e.g. grounded theory, discourse analysis, ethnography, phenomenology, content analysis |                      |
| <i>Participant selection</i>                   |          |                                                                                                                                                          |                      |
| Sampling                                       | 10       | How were participants selected? e.g. purposive, convenience, consecutive, snowball                                                                       |                      |
| Method of approach                             | 11       | How were participants approached? e.g. face-to-face, telephone, mail, email                                                                              |                      |
| Sample size                                    | 12       | How many participants were in the study?                                                                                                                 |                      |
| Non-participation                              | 13       | How many people refused to participate or dropped out? Reasons?                                                                                          |                      |
| <i>Setting</i>                                 |          |                                                                                                                                                          |                      |
| Setting of data collection                     | 14       | Where was the data collected? e.g. home, clinic, workplace                                                                                               |                      |
| Presence of non-participants                   | 15       | Was anyone else present besides the participants and researchers?                                                                                        |                      |
| Description of sample                          | 16       | What are the important characteristics of the sample? e.g. demographic data, date                                                                        |                      |
| <i>Data collection</i>                         |          |                                                                                                                                                          |                      |
| Interview guide                                | 17       | Were questions, prompts, guides provided by the authors? Was it pilot tested?                                                                            |                      |
| Repeat interviews                              | 18       | Were repeat interviews carried out? If yes, how many?                                                                                                    |                      |
| Audio/visual recording                         | 19       | Did the research use audio or visual recording to collect the data?                                                                                      |                      |
| Field notes                                    | 20       | Were field notes made during and/or after the interview or focus group?                                                                                  |                      |
| Duration                                       | 21       | What was the duration of the interviews or focus group?                                                                                                  |                      |
| Data saturation                                | 22       | Was data saturation discussed?                                                                                                                           |                      |
| Transcripts returned                           | 23       | Were transcripts returned to participants for comment and/or                                                                                             |                      |

| Topic                                  | Item No. | Guide Questions/Description                                                                                                        | Reported on Page No. |
|----------------------------------------|----------|------------------------------------------------------------------------------------------------------------------------------------|----------------------|
|                                        |          | correction?                                                                                                                        |                      |
| <b>Domain 3: analysis and findings</b> |          |                                                                                                                                    |                      |
| <i>Data analysis</i>                   |          |                                                                                                                                    |                      |
| Number of data coders                  | 24       | How many data coders coded the data?                                                                                               |                      |
| Description of the coding tree         | 25       | Did authors provide a description of the coding tree?                                                                              |                      |
| Derivation of themes                   | 26       | Were themes identified in advance or derived from the data?                                                                        |                      |
| Software                               | 27       | What software, if applicable, was used to manage the data?                                                                         |                      |
| Participant checking                   | 28       | Did participants provide feedback on the findings?                                                                                 |                      |
| <i>Reporting</i>                       |          |                                                                                                                                    |                      |
| Quotations presented                   | 29       | Were participant quotations presented to illustrate the themes/findings?<br>Was each quotation identified? e.g. participant number |                      |
| Data and findings consistent           | 30       | Was there consistency between the data presented and the findings?                                                                 |                      |
| Clarity of major themes                | 31       | Were major themes clearly presented in the findings?                                                                               |                      |
| Clarity of minor themes                | 32       | Is there a description of diverse cases or discussion of minor themes?                                                             |                      |

Developed from: Tong A, Sainsbury P, Craig J. Consolidated criteria for reporting qualitative research (COREQ): a 32-item checklist for interviews and focus groups. *International Journal for Quality in Health Care*. 2007. Volume 19, Number 6: pp. 349 – 357

**Once you have completed this checklist, please save a copy and upload it as part of your submission. DO NOT include this checklist as part of the main manuscript document. It must be uploaded as a separate file.**
